# Supplementary material for: Assessing the safety and pharmacokinetics of the anti-HIV monoclonal antibody CAP256V2LS alone and in combination with VRC07-523LS and PGT121 in South African women: study protocol for the first-in-human CAPRISA 012B phase I clinical trial
Source: PubMed Central journal article supplement — BMJ Open. 2020 Nov 26;10(11):e042247. doi: 10.1136/bmjopen-2020-042247 (PMC7692975; doi:10.1136/bmjopen-2020-042247), 2020-11-26
Supplement: bmjopen-2020-042247.draft_revisions.pdf [file bmjopen-2020-042247.draft_revisions.pdf]

# BMJ Open

BMJ Open is committed to open peer review. As part of this commitment we make the peer review history of every article we publish publicly available.

When an article is published we post the peer reviewers' comments and the authors' responses online. We also post the versions of the paper that were used during peer review. These are the versions that the peer review comments apply to.

The versions of the paper that follow are the versions that were submitted during the peer review process. They are not the versions of record or the final published versions. They should not be cited or distributed as the published version of this manuscript.

BMJ Open is an open access journal and the full, final, typeset and author-corrected version of record of the manuscript is available on our site with no access controls, subscription charges or pay-per-view fees (<http://bmjopen.bmj.com>).

If you have any questions on BMJ Open's open peer review process please email [info.bmjopen@bmj.com](mailto:info.bmjopen@bmj.com)

# BMJ Open

## Assessing the safety and pharmacokinetics of the anti-HIV monoclonal antibody CAP256V2LS alone and in combination with VRC07-523LS and PGT121 in South African women: study protocol for the first-in-human CAPRISA 012B phase I clinical trial

|                               |                                                                                                                                                                                                                                                                                                                                                                                                                                                                                                                                                                                                                                                                                                                                                                                                                                                                                                                                                                                                                                                                                                                                                                                                                                                                                                                                                                                                                                                                                                           |
|-------------------------------|-----------------------------------------------------------------------------------------------------------------------------------------------------------------------------------------------------------------------------------------------------------------------------------------------------------------------------------------------------------------------------------------------------------------------------------------------------------------------------------------------------------------------------------------------------------------------------------------------------------------------------------------------------------------------------------------------------------------------------------------------------------------------------------------------------------------------------------------------------------------------------------------------------------------------------------------------------------------------------------------------------------------------------------------------------------------------------------------------------------------------------------------------------------------------------------------------------------------------------------------------------------------------------------------------------------------------------------------------------------------------------------------------------------------------------------------------------------------------------------------------------------|
| Journal:                      | <i>BMJ Open</i>                                                                                                                                                                                                                                                                                                                                                                                                                                                                                                                                                                                                                                                                                                                                                                                                                                                                                                                                                                                                                                                                                                                                                                                                                                                                                                                                                                                                                                                                                           |
| Manuscript ID                 | bmjopen-2020-042247                                                                                                                                                                                                                                                                                                                                                                                                                                                                                                                                                                                                                                                                                                                                                                                                                                                                                                                                                                                                                                                                                                                                                                                                                                                                                                                                                                                                                                                                                       |
| Article Type:                 | Protocol                                                                                                                                                                                                                                                                                                                                                                                                                                                                                                                                                                                                                                                                                                                                                                                                                                                                                                                                                                                                                                                                                                                                                                                                                                                                                                                                                                                                                                                                                                  |
| Date Submitted by the Author: | 30-Jun-2020                                                                                                                                                                                                                                                                                                                                                                                                                                                                                                                                                                                                                                                                                                                                                                                                                                                                                                                                                                                                                                                                                                                                                                                                                                                                                                                                                                                                                                                                                               |
| Complete List of Authors:     | <p>Mahomed, Sharana; Centre for the Aids Programme of Research in South Africa,<br/> Garrett, Nigel; CAPRISA<br/> Karim, Quarraisha Abdool; CAPRISA; Columbia University, Department of Epidemiology, Mailman School of Public Health<br/> Zuma, Nonhlanhla ; CAPRISA<br/> capparelli, edmund; University of California San Diego<br/> Baxter, Cheryl; CAPRISA<br/> Gengiah, Tanuja; CAPRISA<br/> Archary, Derseree; CAPRISA<br/> Samsunder, Natasha; Centre for the Aids Programme of Research in South Africa<br/> Rose, Nicole; National Institutes of Health<br/> Moore, Penny; CAPRISA; National Institute for Communicable Diseases<br/> Williamson, Carolyn; University of Cape Town, Division of Medical Virology, Institute of Infectious Disease and Molecular Medicine; National Health Laboratory Service<br/> Barouch, Dan; Beth Israel Deaconess Medical Center, Center for Virology and Vaccine Research, Br, Boston, USA<br/> Fast, Patricia; International Aids Vaccine Initiative<br/> Pozzetto, Bruno; Saint-Etienne University Hospital Centre Geriatrics and Internal Medicine Section<br/> Hankins, Catherine; AIGHD, Amsterdam Institute for Global Health and Development<br/> Carlton, Kevin; National Institutes of Health<br/> Ledgerwood, Julie; NIH<br/> Morris, Lynn; National Institute for Communicable Diseases; CAPRISA<br/> Mascola, John; NIH<br/> Abdool Karim, Salim; CAPRISA; Columbia University, Department of Epidemiology, Mailman School of Public Health</p> |
| Keywords:                     | INFECTIOUS DISEASES, HIV & AIDS < INFECTIOUS DISEASES, Microbiology < PATHOLOGY, Public health < INFECTIOUS DISEASES                                                                                                                                                                                                                                                                                                                                                                                                                                                                                                                                                                                                                                                                                                                                                                                                                                                                                                                                                                                                                                                                                                                                                                                                                                                                                                                                                                                      |
|                               |                                                                                                                                                                                                                                                                                                                                                                                                                                                                                                                                                                                                                                                                                                                                                                                                                                                                                                                                                                                                                                                                                                                                                                                                                                                                                                                                                                                                                                                                                                           |

1  
2  
3  
4  
5  
6  
7  
8  
9  
10  
11  
12  
13  
14  
15  
16  
17  
18  
19  
20  
21  
22  
23  
24  
25  
26  
27  
28  
29  
30  
31  
32  
33  
34  
35  
36  
37  
38  
39  
40  
41  
42  
43  
44  
45  
46  
47  
48  
49  
50  
51  
52  
53  
54  
55  
56  
57  
58  
59  
60

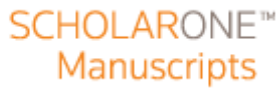

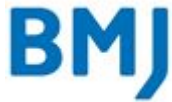

I, the Submitting Author has the right to grant and does grant on behalf of all authors of the Work (as defined in the below author licence), an exclusive licence and/or a non-exclusive licence for contributions from authors who are: i) UK Crown employees; ii) where BMJ has agreed a CC-BY licence shall apply, and/or iii) in accordance with the terms applicable for US Federal Government officers or employees acting as part of their official duties; on a worldwide, perpetual, irrevocable, royalty-free basis to BMJ Publishing Group Ltd ("BMJ") its licensees and where the relevant Journal is co-owned by BMJ to the co-owners of the Journal, to publish the Work in this journal and any other BMJ products and to exploit all rights, as set out in our [licence](#).

The Submitting Author accepts and understands that any supply made under these terms is made by BMJ to the Submitting Author unless you are acting as an employee on behalf of your employer or a postgraduate student of an affiliated institution which is paying any applicable article publishing charge ("APC") for Open Access articles. Where the Submitting Author wishes to make the Work available on an Open Access basis (and intends to pay the relevant APC), the terms of reuse of such Open Access shall be governed by a Creative Commons licence – details of these licences and which [Creative Commons](#) licence will apply to this Work are set out in our licence referred to above.

Other than as permitted in any relevant BMJ Author's Self Archiving Policies, I confirm this Work has not been accepted for publication elsewhere, is not being considered for publication elsewhere and does not duplicate material already published. I confirm all authors consent to publication of this Work and authorise the granting of this licence.

## Protocol Paper - CAPRISA 012B

### Title

Assessing the safety and pharmacokinetics of the anti-HIV monoclonal antibody CAP256V2LS alone and in combination with VRC07-523LS and PGT121 in South African women: study protocol for the first-in-human CAPRISA 012B phase I clinical trial

### Authors

Sharana Mahomed<sup>1</sup>, Nigel Garrett<sup>1,2</sup>, Quarraisha Abdool Karim<sup>1,3</sup>, Nonhlanhla Yende-Zuma<sup>1</sup>, Edmund Capparelli<sup>4</sup>, Cheryl Baxter<sup>1</sup>, Tanuja N. Gengiah<sup>1</sup>, Derseree Archary<sup>1</sup>, Natasha Samsunder<sup>1</sup>, Nicole A. Doria-Rose<sup>5</sup>, Penny L. Moore<sup>1,6</sup>, Carolyn Williamson<sup>1, 7, 8</sup>, Dan H Barouch<sup>9</sup>, Patricia E Fast<sup>10</sup>, Bruno Pozzetto<sup>11</sup>, Catherine A. Hankins<sup>12</sup>, Kevin Carlton<sup>5</sup>, Julie E. Ledgerwood<sup>5</sup>, Lynn Morris<sup>1,6</sup>, John R. Mascola<sup>5</sup>, Salim S. Abdool Karim<sup>1,3</sup>

### Author affiliations

1. Centre for the AIDS Programme of Research in South Africa (CAPRISA), Durban, South Africa
2. Department of Public Health Medicine, School of Nursing and Public Health, University of KwaZulu-Natal, Durban, South Africa
3. Department of Epidemiology, Mailman School of Public Health, Columbia University, New York, USA
4. University of California San Diego, San Diego, California, USA
5. Vaccine Research Center, National Institutes of Health, Bethesda, Maryland, USA
6. National Institute for Communicable Diseases of the National Health Laboratory Services, Johannesburg, South Africa
7. Division of Medical Virology, Institute of Infectious Disease and Molecular Medicine, University of Cape Town, Cape Town, South Africa.
8. National Health Laboratory Services of South Africa
9. Center for Virology and Vaccine Research, Beth Israel Deaconess Medical Center, Boston, USA
10. International AIDS Vaccine Initiative, New York, New York, USA
11. GIMAP (EA3064), University of Saint-Etienne/University of Lyon, Saint-Etienne, France
12. Amsterdam Institute for Global Health and Development

### Corresponding Author

Sharana Mahomed

1  
2  
3 Address: Centre for the AIDS Programme of Research in South Africa (CAPRISA), 3  
4 University Avenue, Durban, South Africa  
5  
6 Telephone number: 031 655 0610  
7  
8 Cell Number: 0813189848  
9  
10 Email address: [Sharana.Mahomed@caprisa.org](mailto:Sharana.Mahomed@caprisa.org)  
11

12 **Abstract:** (297/300)  
13

### 14 **Introduction**

15  
16 New HIV prevention strategies are urgently required. The discovery of broadly neutralizing  
17 antibodies (bNAbs) has provided the opportunity to evaluate passive immunisation as a  
18 potential prevention strategy and facilitate vaccine development. Since 2014, several bNAbs  
19 have been isolated from a clade C infected South African donor, CAPRISA256. One  
20 particular bNAb, CAP256-VRC26.25, was found to be extremely potent, with good coverage  
21 against clade C viruses, the dominant HIV clade in sub-Saharan Africa. Challenge studies in  
22 non-human primates demonstrated that this antibody was fully protective even at extremely  
23 low doses. This bNAb was subsequently structurally engineered and the clinical variant is  
24 now referred to as CAP256V2LS.  
25  
26  
27  
28  
29  
30  
31  
32

### 33 **Methods and analysis**

34  
35 CAPRISA 012B is the second of three trials in the CAPRISA 012 bNAb trial programme. It is  
36 a first-in-human, phase I study to assess the safety and pharmacokinetics of CAP256V2LS.  
37 The study is divided into four groups. Group 1 is a dose escalation of CAP256V2LS  
38 administered intravenously to HIV-negative and HIV-positive women. Group 2 is a dose  
39 escalation of CAP256V2LS administered subcutaneously, with and without the dispersing  
40 agent recombinant human hyaluronidase (rHuPH20) as single or repeat doses in HIV-  
41 negative women. Groups 3 and 4 are randomized placebo controlled to assess two  
42 (CAP256V2LS + VRC07-523LS; CAP256V2LS + PGT121) and three (CAP256V2LS +  
43 VRC07-523LS + PGT121) bNAb combinations administered subcutaneously. Safety will be  
44 assessed by the frequency of reactogenicity and adverse events related to study product.  
45 Pharmacokinetic disposition of CAP256V2LS alone and in combination with VRC07-523LS  
46 and PGT121 will be assessed via dose sub-groups and route of administration.  
47  
48  
49  
50  
51  
52  
53  
54

### 55 **Ethics and dissemination**

56  
57 The University of KwaZulu-Natal Biomedical Research Ethics Committee and the South  
58 African Health Products Regulatory Authority have granted regulatory approval. Trial results  
59  
60

1  
2  
3 will be disseminated through conference presentations, peer-reviewed publications, and the  
4 clinical trial registry.  
5  
6  
7

### 8 **Registration details**

9 PACTR202003767867253 (Status: Pre-Results)  
10  
11  
12

### 13 **Strengths and limitations of this study**

- 14 • This is the first in-human trial to assess the safety and pharmacokinetics of the  
15 antibody CAP256V2LS
- 16 • The trial will provide new safety, pharmacokinetic, and functional activity data for the  
17 administration of CAP256V2LS alone and in combination with VRC07-523LS and/or  
18 PGT121.
- 19 • The trial will provide new data on the administration of bNAbs via the subcutaneous  
20 route compared to the intravenous route.
- 21 • This trial is one of the first to assess the use of a recombinant human hyaluronidase  
22 (rHuPH20), a subcutaneous dispersing agent, together with an anti-HIV monoclonal  
23 antibody.
- 24 • Data from this trial could inform the development of a four- or six-monthly injectable  
25 HIV prevention technology for young women in sub-Saharan Africa.  
26  
27  
28  
29  
30  
31  
32  
33  
34  
35  
36

### 37 **Introduction**

38 Despite extensive prevention and treatment efforts, South Africa remains the country worst  
39 affected by the HIV-AIDS pandemic (1). Here, young women carry a disproportionately high  
40 burden of the disease with a persistently high HIV incidence (2, 3). Insights from universal  
41 testing and treatment trials demonstrate that early treatment alone is not sufficient to reduce  
42 the number of new infections and achieve epidemic control, but that effective HIV prevention  
43 methods are also needed (4). In African women, clinical trials evaluating daily oral tenofovir  
44 disoproxil fumarate (TDF) and emtricitabine (TDF/FTC) for pre-exposure prophylaxis  
45 demonstrated inconsistent results, most likely owing to varying adherence levels (5). While  
46 an effective vaccine remains a major challenge, new HIV prevention strategies are urgently  
47 required (6).  
48  
49  
50  
51  
52  
53  
54

55 The discovery of broadly neutralizing antibodies (bNAbs) has allowed scientists to evaluate  
56 passive immunisation as a potential HIV prevention strategy (7, 8). These antibodies are  
57 generally recovered from the memory B cells of chronically HIV-infected individuals and  
58  
59  
60

1  
2  
3 effectively neutralize diverse strains of HIV-1 indicating their breadth of response. Pre-  
4 clinical studies have demonstrated that passive immunisation using bNAbs protects rhesus  
5 macaques from simian-human immunodeficiency virus (SHIV) infection (9-12). However,  
6 there are currently no clinical trial data that show the ability of bNAbs to prevent HIV-1  
7 infection in humans (13).  
8  
9  
10

11  
12 In 2014 and subsequently, several bNAbs targeting the V2 region of the HIV-1 envelope  
13 glycoprotein were isolated from a South African donor participating in the Centre for the  
14 AIDS Programme of Research in South Africa (CAPRISA) 002 Acute Infection study (14,  
15 15). This study was established in 2004 in KwaZulu-Natal, South Africa and followed HIV-  
16 negative participants for identification of subsequent HIV seroconversion. This participant  
17 was infected with a clade C virus and superinfected with a different clade C virus, 15 weeks  
18 later (16). One particular bNAb, referred to as CAP256-VRC26.25, was isolated and found to  
19 be 10 times more potent than the previously published members of this lineage. Its overall  
20 potency ( $IC_{50} = 0.001$  ug/ml) was comparable to, or better than that of existing bNAbs (17).  
21  
22  
23  
24  
25  
26  
27

28 The exceptional potency of this antibody may be related to the reduced dependence on the  
29 N160 glycan, the unique long heavy-chain complementarity-determining region 3 (CDRH3)  
30 conformation, or other structural features that have yet to be identified (18-21). Further  
31 research using site-directed mutagenesis allowed for the manufacturing of an improved LS  
32 version of CAP256-VRC26.25. This mutation increases the binding affinity for the neonatal  
33 Fc-receptor (FcRn), resulting in an increased recirculation of functional immunoglobulin G  
34 (IgG), thereby increasing plasma half-life (22). *In vivo* studies demonstrated that CAP256-  
35 VRC26.25LS was fully protective against a SHIV challenge in monkeys, even at the lowest  
36 dose of 0.08mg/kg, with protection achieved at serum antibody concentrations of <0.75  $\mu$ g/m  
37 (23). This was the lowest dose of any bNAb to show protection in monkeys (24).  
38  
39  
40  
41  
42  
43  
44  
45

46 Furthermore, when tested against a panel of 200 acute infection clade C pseudoviruses,  
47 CAP256-VRC26.25 emerged as the most potent member of bNAbs targeting the V2 loop  
48 (10, 17). The neutralization profile of CAP256-VRC26.25LS was particularly well suited as a  
49 complementary bNAb in combinations with bNAbs targeting other epitopes (17).  
50

51 CAP256-VRC26.25LS was subsequently engineered to prevent proteolytic clipping of the  
52 heavy chain through mutation of the lysine at position 100 to an alanine (25). This single  
53 amino acid change, K127A, was made in the CDRH3 region to improve manufacturability  
54 without altering neutralization potency or breadth. This non-clipped variant of the antibody is  
55 referred to as CAP256V2LS.  
56  
57  
58  
59  
60



1  
2  
3 Pre-clinical studies in rhesus macaques demonstrated that CAP256V2LS has a half-life of  
4 14.3 days when administered via the intravenous (IV) route and 9.9 days when administered  
5 via the subcutaneous (SC) route. Toxicology reports showed that CAP256V2LS displayed  
6 low poly-specific auto-reactivity to HEp-2 cells and cardiolipin (26). Its high potency and  
7 good breadth against clade C HIV viruses and long half-life make CAP256V2LS an excellent  
8 candidate for further clinical development. This is particularly important for southern Africa,  
9 where clade C is the dominant circulating virus.  
10  
11  
12  
13  
14

15  
16 The research and development pathway of the CAP256V2LS bNAb led to the CAPRISA 012  
17 clinical trial programme that consists of three trials conducted in South Africa (Figure 1). This  
18 programme aims to evaluate the concept of bNAbs as long-acting pre-exposure prophylaxis  
19 with two to three SC doses per year to reduce HIV incidence among young women in three  
20 trials: CAPRISA 012A, a phase 1 trial of VRC07-523LS and PGT121 in HIV-negative  
21 women, previously described in this journal (27), CAPRISA 012B, described here, and  
22 CAPRISA 012C, a phase 2 combination bNAb trial in young women.  
23  
24  
25  
26  
27

28 In CAPRISA 012B, CAP256V2LS will be assessed alone and in combination with VRC07-  
29 523LS and/or PGT121. VRC07-523LS targets the HIV-1 Envelope CD4 binding site and  
30 PGT121 targets the V3 glycan-dependent epitope region of the HIV Envelope protein. Given  
31 the vast genetic diversity of HIV-1, the use of multiple bNAbs may be required to ensure  
32 adequate coverage of circulating strains. Recent clinical trial data demonstrate that VRC07-  
33 523LS is safe with a half-life of 38 days after IV administration and 33 days after SC  
34 administration (28). Preliminary clinical trial data of PGT121 also demonstrate safety with a  
35 half-life of 22 days (29).  
36  
37  
38  
39  
40  
41  
42

43 This trial is also one of the first to assess the use of a recombinant human hyaluronidase  
44 (rHuPH20) together with an anti-HIV monoclonal antibody. rHuPH20 is the active ingredient  
45 of the investigational ENHANZE™ Drug Product (EDP) and optimizes the SC delivery of  
46 co-administered therapeutics by depolymerizing hyaluronan in the extracellular matrix of the  
47 SC space that normally serves to restrict increased flow volumes. EDP allows co-mixing of  
48 antibodies with rHuPH20 at the clinical site. Clinical trials conducted in oncology have  
49 demonstrated safety and favourable results with this product (30).  
50  
51  
52  
53  
54  
55  
56  
57

## 58 **Methods and analysis**

59  
60

### **Patient and public involvement**

The CAPRISA Community Advisory Board (CAB) plays a central role in study planning and recruitment of participants. The CAB includes local community leaders, traditional leaders, leadership of local HIV/AIDS organisations, local health service provider representatives, previous study participants, and HIV-positive local community members. During trial preparation and prior to study start, the study concept is presented to the CAB members for their feedback. Recruitment will include community events, local clinics, street recruitment, and use of snowballing techniques. A recruitment and retention plan will be drawn up at study start and will be reviewed and updated regularly.

### **Study setting**

The CAPRISA 012B trial will be conducted at the CAPRISA eThekweni Clinical Research Site (ECRS). This site is based in a busy commuter area in the city centre of Durban, KwaZulu-Natal, South Africa.

### **Study population selection**

The study population will consist of 66 women, 52 HIV-negative and 14 HIV-positive women who have not yet started antiretroviral therapy (ART). All eligibility criteria must be met, and HIV-positive women will be recruited based on additional inclusion criteria (Table 1).

### **Study Design**

CAPRISA 012B is a first-in-human, phase I study to assess the safety, tolerability, and pharmacokinetics (PK) of CAP256V2LS. The study is divided into four groups (Table 2). Group 1 is a dose escalation of CAP256V2LS administered IV to HIV-negative and HIV-positive women. Group 2 is a dose escalation of CAP256V2LS administered SC with and without rHuPH20 at a single or repeat dose to HIV-negative women. Groups 3 and 4 are randomized placebo controlled to assess two (CAP256V2LS + VRC07-523LS; CAP256V2LS + PGT121) and three (CAP256V2LS + VRC07-523LS + PGT121) bNAb combinations administered SC. Participants will be followed up for 24 weeks after the administration of the last dose of study product/s. HIV positive participants in Groups 1c and 1d will have two additional follow up visits after 12 and 24 months.

### **Study Objectives**

#### *Primary objectives*

- To evaluate the safety and tolerability of CAP256V2LS administered
  - SC in HIV-negative women

- IV in HIV-negative and HIV-positive women
- SC in combination with VRC07-523LS and/or PGT121 in HIV-negative women

### *Secondary objectives*

- To characterize the PK profile of CAP256V2LS administered SC as a single dose or as two doses 16 or 24 weeks apart
- To characterize the PK profile of CAP256V2LS administered in combination with VRC07-523LS and/or PGT121
- To characterize the PK profile of CAP256V2LS administered IV as a single dose in HIV-negative and HIV-positive women
- To evaluate the antiviral activity of CAP256V2LS administered IV to HIV-positive women not on ART
- To evaluate the concentrations and functional activity of CAP256V2LS in plasma and genital samples following SC and IV administration
- To determine whether administration of CAP256V2LS induces anti-monoclonal antibody responses
- To assess the acceptability of SC administration of monoclonal antibodies among participants

### *Primary Endpoints*

- Proportion of participants with mild, moderate, and severe reactogenicity events within the first 3 days after IV or SC administration of CAP256V2LS
- Proportion of participants with mild, moderate, and severe adverse events (SAEs) related to the IV or SC administration of CAP256V2LS

### *Secondary Endpoints*

- The difference in the elimination half-life, clearance, volume of distribution, and area under the concentration decay curve among study groups
- Change in plasma HIV-1 RNA levels from baseline
- Changes in the concentration of serum anti-CAP256V2LS titres from baseline
- The difference in the functional activity including IgG/IgA binding responses, cellular immune responses, and antibody function in plasma and mucosal surfaces compared to baseline
- Proportion of participants reporting CAP256V2LS injections to be acceptable as per study questionnaire

## Sample size calculation

The main objective of this study is to assess the safety, tolerability, and PK of CAP256V2LS, hence the ability of the study to detect SAEs is key. The probability of detecting no SAE, at least one, or at least two SAEs at a specified true event rate will be calculated. These probabilities highlight the likelihood of the study to detect either rare or common adverse events (AEs). In addition, the 95% confidence interval for the true event rate was calculated. Currently, limited safety data are available to guide the estimation of the true event rate that might be observed in the study. In the absence of available AE rates for CAP256V2LS alone or in combination with other bNABs, a range of hypothesized event rates to calculate the probability of observing no events, at least one event, or at least two events were used. Among the four participants receiving active product in each of the groups, there is a 34% chance of observing at least one event if the true event rate is 10%. When the true event rate is two or three times higher, this probability rises to 59% and 76% (Table 3).

Since the phase I assessment of the safety of CAP256V2LS administered SC includes eight participants receiving combination of CAP256V2LS and VRC07-523.LS (i.e. Groups 3a and 3b combined), for N=8, there is an 8% chance of observing at least one event, if the true event rate is 1%, but it is as high as 83%, if the true event is 20%. These probabilities are also applicable to the groups that will receive repeat doses (Group 2d and 2f). For the 16 participants receiving CAP256V2LS administered IV in Group 1, there is an 85% chance of observing no events if the event rate is 1%, and less than 1% chance, if the event rate is 30-fold higher. However, if all 56 women receiving CAP256V2LS active product at enrolment are combined, the former probability changes to 57% for no events and remains very low (<1%)-given the event rates of 10%, 20% and 30%. As expected, an increase in sample size, increases the likelihood of detecting rare events.

## Study procedures

### *Informed consent*

Prior to screening and enrolment, informed consent will be obtained from every participant in accordance with the South African Good Clinical Practice guidelines. The informed consent procedure will be conducted in either English or isiZulu as per participant preference. If a participant is illiterate, an impartial witness will be present throughout the informed consent procedure to ensure that all questions are answered to the satisfaction of the potential participant. For the purposes of this study, consent for all study related procedures, pharmacogenetic studies, and storage of specimens will be obtained.

### *Screening*

All potential participants will complete the informed consent procedure for screening and provide relevant identification documents. In order to rule out co-enrolment in other intervention trials, potential participants' details will be checked on the Biometric Co-Enrolment Prevention System (BCEPS). The study team will also evaluate and review proof of contraceptive use, such as family planning records. HIV pre-counselling will be performed, and if the participant meets eligibility, the socio-demographic and behavioural questionnaires will be administered. Post-test counselling is provided after disclosure of all HIV results and if the participant is ineligible to enrol into the study, referral to one of several HIV/AIDS care programmes will be facilitated. HIV testing in this study will be conducted by following a study HIV algorithm. At screening, HIV testing will be performed using two rapid antibody testing kits. Any participant with discordant results will be regarded as ineligible and referred to medical care.

A comprehensive medical history and physical examination will be conducted to determine eligibility. All pre-existing conditions and concomitant medication information will be documented. Screening laboratory tests will be conducted as per the schedule of evaluations (SOE) to determine further eligibility. These tests include urinalysis, haematology, blood chemistry tests, liver function tests, testing for sexually transmitted infections including syphilis serology and hepatitis B virus assays. Serum and plasma specimens will also be stored, for further analyses. In addition, a genital specimen using a menstrual cup device will be obtained and stored (31).

### *Randomisation*

An unblinded statistician who is not involved in study conduct, will be responsible for generating the randomization sequence (for groups 1c, 1d, 3a to 3c and Group 4a) using SAS version 9.4 software or latest. Participants will be assigned to unique participant identification numbers stratified by HIV status and group number. Sequentially numbered, sealed, opaque envelopes containing the group number and envelope number or treatment code (for use by the unblinded pharmacist only) will be provided to the study coordinator, to be opened once a participant has been deemed eligible and is ready to be enrolled into the study.

The pharmacist will store envelopes in a secured location within the research pharmacy with access restricted to delegated study pharmacists only. The study pharmacist will also receive a randomization list consisting of the unique three-digit envelope number and study

1  
2  
3 group with the corresponding study drug or placebo and relevant dosage from the unblinded  
4 statistician. The envelope number will enable the unblinded pharmacist to assign the correct  
5 treatment to the correct participant.  
6  
7

### 8 9 *Enrolment*

10  
11 Enrolment will take place within 56 days of screening. After the informed consent is obtained  
12 and eligibility criteria are met, the participant will be allocated to a study group (Table 2). At  
13 this visit, vital signs will be recorded, a targeted physical examination will be conducted and  
14 all laboratory results from the screening visit will be reviewed. For women of childbearing  
15 potential, a negative pregnancy test on that day must be obtained prior to product  
16 administration. Prior to the infusion/injection, the study team must ensure that the participant  
17 is eligible to receive study product. All study product administrations will be completed  
18 according to the assigned group and may be via an IV infusion or SC injection. Once safety  
19 has been established in the first participants, enrolment into the next groups as well as dose-  
20 escalation will take place in a sequential manner, following review at each step of safety data  
21 from the preceding groups. For the bNAb combination groups, two separate injections, each  
22 containing a single bNAb, will be administered. After receiving study product, all participants  
23 will be observed for a minimum of 1 hour after the first product and any repeat product  
24 administrations. PK analysis on blood draws will be conducted for both the IV and SC  
25 administration groups at timelines outlined in the SOE.  
26  
27  
28  
29  
30  
31  
32  
33  
34  
35

### 36 *Management of HIV-positive participants enrolled into Group 1c and 1d*

37  
38 All potential volunteers who meet the eligibility criteria for enrolment will receive extensive  
39 ART counselling upon entering the study. The benefits of early ART initiation including the  
40 universal treatment policy, will be explained. Only participants who, after appropriate  
41 counselling, are willing to defer ART initiation will be eligible to enrol. At each study visit the  
42 participant's decision to defer ART initiation will be reviewed, and participants are allowed to  
43 change their mind and start treatment at any stage during the study. During the study, HIV  
44 positive participants will be monitored closely with regular clinical and safety assessments.  
45 HIV viral load monitoring and CD4 count measurements will take place as per SOE.  
46 Participants will be counselled on reducing the risk of HIV transmission to their sexual  
47 partners. Furthermore, a multidisciplinary approach to HIV transmission risk mitigation will be  
48 followed as per guidance from previous publications (32).  
49  
50  
51  
52  
53  
54  
55  
56

57 Specific criteria to initiate ART within 8 weeks of product administration are listed below and  
58 have been outlined as per guidance previously described for studies designed for ART  
59 interruption (33). Once any of these criteria are met, the participant will receive ART  
60

1  
2  
3 counselling and will be initiated on ART as per South African guidelines. Criteria to start ART  
4 within 8 weeks of product administration include:

- 5 • Two consecutive viral loads >10,000 copies/ml after 2 weeks post product administration
- 6 • CD4 count <350 cells/mL
- 7 • Pregnancy
- 8 • If ART is deemed medically necessary
- 9 • If requested by the participant at any stage during the study

## 16 **Safety monitoring**

### 17 *Reactogenicity assessments*

18 After study product administration, the participant will be seen at the clinic for safety  
19 assessments on the day of product administration (Day 0), as well as Day 1, Day 2, and Day  
20 3 (4 days in total). Clinicians and/or nurses will assess the product administration site(s) for  
21 local reactogenicity on the day of product administration and during the scheduled follow-up  
22 visits for all groups. Participants will keep a daily diary of local and systemic symptoms and  
23 record their temperature for three days after each product administration. In the event of a  
24 missed reactogenicity clinic visit, study staff will review the diary together with the participant  
25 once they present to the clinic and will determine the severity of the reactions. For any  
26 reactogenicity symptoms that are not resolved within 3 days, clinicians will follow and collect  
27 resolution information.

### 36 *Safety monitoring*

37 Safety monitoring includes internal monitoring by the study team, the protocol safety review  
38 team (PSRT), and data safety monitoring board (DSMB), as well as external monitoring  
39 including audits. Safety reporting of SAEs, AEs, and other important reportable events will  
40 be the responsibility of the entire study team. In addition, the study statistician will prepare  
41 routine study safety progress reports, which include reports of AEs experienced by study  
42 participants (blinded to treatment assignment), for review by the PSRT. The PSRT will  
43 review the clinical safety data on a weekly basis via electronic distribution of reports and will  
44 have face-to-face meetings as required. The PSRT will be responsible for decisions related  
45 to participant safety. In addition, an independent DSMB will meet in-person and/or via  
46 teleconference bi-annually and review the study data and study conduct. The DSMB could  
47 recommend that the study should proceed as designed, should proceed with design  
48 modifications, or should be discontinued. Furthermore, the PI will permit authorized  
49 representatives such as external monitors and auditors to inspect the site facilities and  
50 records relevant to the study.

### *Follow up visits*

All enrolled participants in both intervention and control arms will have follow up visits as specified in the SOE. At these visits, behavioural questionnaires will be administered together with HIV risk reduction counselling. Contraception counselling and provision will also take place. Targeted physical examinations will be conducted and all reactogenicity and AEs will be recorded. Laboratory investigations specified in the SOE will be conducted by the CAPRISA Research Laboratories. Where required, sample processing and storage of specimens for potential future testing (blood and vaginal specimens) will also be undertaken. An accredited contract laboratory will perform all safety blood testing and provide a backup laboratory service when required.

### **Statistical Analysis**

Baseline characteristics including demographics and laboratory measurements will be summarized using descriptive statistics either by group or overall. Summaries of the number and percentage of participants experiencing any AE or reactogenicity will be analysed. AEs and SAEs will be coded into the Medical Dictionary for Regulatory Activities (MedDRA) preferred terms. The number and percentages of participants experiencing each specific AE will be tabulated by severity and relationship to study product. For the calculations in these tables, each participant's AE will be counted once under the maximum severity or strongest recorded causal relationship to study product. A complete listing of AEs for each participant will provide details including severity, relationship to study product, onset, duration and outcome. Tolerability evaluation will be mostly descriptive and consist of solicited AEs that occur within 1 hour following study product administration and reasons for any withdrawal or discontinuation based on participant discomfort. This early assessment of tolerability of the monoclonal antibodies will inform which parameters should be solicited or routinely assessed to further characterise the tolerability profile in a larger number of participants. Where appropriate, some of the data will be presented graphically. Analysis will be carried out using either SAS V.9.4 or higher or R.

### **Pharmacokinetic analysis**

Pharmacokinetic disposition of CAP256V2LS alone and in combination with VRC07-523LS and PGT121 will be evaluated in this study and PK will be assessed via dose sub-groups and route of administration. Sixteen participants will receive CAP256V2LS by the IV route. The two lower dose levels will be administered to HIV-negative participants and the highest dose level will be administered to HIV-positive participants. These PK data will serve to characterize dose effects on CAP256V2LS clearance, volumes of distribution, and



1  
2  
3 elimination half-life. The PK data across Group 1 will also enable a preliminary evaluation of  
4 the potential impact of HIV status on CAP256V2LS PK. The PK results from the IV  
5 administration groups will be compared to the data from the SC administration groups in  
6 order to estimate bioavailability.  
7  
8  
9

10  
11 A total of 24 participants will receive CAP256V2LS by the SC route, either as a single dose  
12 or a repeat dose. A subset of participants will receive CAP256V2LS with SC hyaluronidase  
13 to allow the larger doses of antibody to be administered SC. These data will allow  
14 concentration profiles, bioavailability, and absorption patterns to be established. The impact  
15 of repeat CAP256V2LS SC administration on PK will also be determined. The PK data from  
16 the combination groups (Group 3 and 4) will be compared with those from Group 2 to  
17 determine if co-administration of VRC07-523LS or PGT121 affects CAP256V2LS PK. In  
18 addition, the VRC07-523LS and PGT121 PK results will be compared with findings from PK  
19 studies in CAPRISA 012A and reported in the literature, to establish whether CAP256V2LS  
20 impacts on the PK of VRC07-523LS and PGT121.  
21  
22  
23  
24  
25  
26  
27

### 28 **Data management**

29  
30 Data for the CAPRISA 012B study will be collected on case report forms (CRFs) designed  
31 specifically to address the protocol requirements. Data will be managed by the CAPRISA  
32 Data Management department, using DFdiscover (DF/Net Research, Inc), software  
33 specifically designed for clinical trial data management. The site will record data on paper  
34 CRFs that will be directly captured onto the DFdiscover system and validated by the data  
35 management staff. All source documents will be kept in the participants' study files and  
36 medical charts at the clinical research site. All original CRFs and study related documents  
37 will be securely stored at the site, during the study and after study completion.  
38  
39  
40  
41  
42  
43

### 44 **Ethics and dissemination**

45  
46 Regulatory approval has been granted by the University of KwaZulu-Natal (UKZN)  
47 Biomedical Research Ethics Committee and by the South African Health Products  
48 Regulatory Authority. The study team will disseminate the trial results by sharing with the  
49 scientific community at international conferences, through peer-reviewed journal  
50 publications, and presentations to the wider community. Trial results will be uploaded onto  
51 the UKZN repository and the Pan-African Clinical Trial Registry (PACTR).  
52  
53  
54  
55

### 56 **Authors' contributions**

57  
58 SSAK and QAK conceived the trial. SSAK, QAK, SM and NG designed the trial. SM and NG  
59 wrote the study protocol. EC will conduct the PK simulations and analysis. NYZ performed  
60

1  
2  
3 sample size calculations and the statistical analysis strategy. KC, NDR, PLM, JM and LM  
4 contributed to antibody development. CB, TNG, DA, NS, CW, DHB, JM, JL, CAH, BP and  
5 PEF contributed to the planning and conduct of the trial. All authors reviewed the manuscript  
6 and consented to publication.  
7  
8

9  
10 **Funding statement**

11 This study is supported by the European and Developing Countries Clinical Trials  
12 Partnership (EDCTP Grant number: RIA2017S) and the South African Medical Research  
13 Council (SAMRC), Special Initiative on HIV Prevention Technology.  
14  
15  
16

17 **Competing interest statement**

18 There are no competing interests to declare.  
19  
20  
21

22 **Patient consent for publication**

23 Not required  
24  
25  
26

27 **Word Count:** 3924/4000  
28  
29  
30  
31  
32  
33  
34  
35  
36  
37  
38  
39  
40  
41  
42  
43  
44  
45  
46  
47  
48  
49  
50  
51  
52  
53  
54  
55  
56  
57  
58  
59  
60

1  
2  
3  
4  
5  
6  
7  
8  
9  
10  
11  
12  
13  
14  
15  
16  
17  
18  
19  
20  
21  
22  
23  
24  
25  
26  
27  
28  
29  
30  
31  
32  
33  
34  
35  
36  
37  
38  
39  
40  
41  
42  
43  
44  
45  
46  
47  
48  
49  
50  
51  
52  
53  
54  
55  
56  
57  
58  
59  
60

## Tables

### Table 1: Eligibility criteria

| Inclusion criteria                                                                                                                                                                                                                                                                                                                                                                                                                                                                                                                                                                                                                                                                                                                                                                                                                                                                                     | Exclusion criteria                                                                                                                                                                                                                                                                                                                                                                                                                                                                                                                                                                                                                                                                                                                                                                                                                                                                                                             | Additional inclusion criteria*                                                                                                                                                                                                                                                                                                                                                                                                                          |
|--------------------------------------------------------------------------------------------------------------------------------------------------------------------------------------------------------------------------------------------------------------------------------------------------------------------------------------------------------------------------------------------------------------------------------------------------------------------------------------------------------------------------------------------------------------------------------------------------------------------------------------------------------------------------------------------------------------------------------------------------------------------------------------------------------------------------------------------------------------------------------------------------------|--------------------------------------------------------------------------------------------------------------------------------------------------------------------------------------------------------------------------------------------------------------------------------------------------------------------------------------------------------------------------------------------------------------------------------------------------------------------------------------------------------------------------------------------------------------------------------------------------------------------------------------------------------------------------------------------------------------------------------------------------------------------------------------------------------------------------------------------------------------------------------------------------------------------------------|---------------------------------------------------------------------------------------------------------------------------------------------------------------------------------------------------------------------------------------------------------------------------------------------------------------------------------------------------------------------------------------------------------------------------------------------------------|
| <ul style="list-style-type: none"> <li>Age 18 to 45 years</li> <li>Born female</li> <li>Able and willing to complete the informed consent process</li> <li>Able to understand the information provided about the study, willing to comply with protocol procedures, and available to attend the study site for the duration of the study</li> <li>Based on clinical assessment, participants must be in good general health as per opinion of the Principal Investigator (PI) or designee</li> <li>Haemoglobin &gt; 10g/dl</li> <li>Neutrophil count within institutional normal range</li> <li>Platelets within institutional normal range</li> <li>Creatinine &lt; 1.1 times upper limit of normal</li> <li>Alanine aminotransferase &lt; 1.25 times upper limit of normal</li> <li>HIV-negative as per FDA-approved method of detection (for groups with HIV-negative participants only)</li> </ul> | <ul style="list-style-type: none"> <li>Any clinically significant acute or chronic medical condition that in the opinion of the PI/designee makes the participant unsuitable for participation in the study, or jeopardises the safety or rights of the participant</li> <li>If planning a pregnancy for the duration of the study, currently pregnant or breastfeeding</li> <li>Exceeding 95 kilograms in body weight</li> <li>A history of alcohol or substance use judged by the PI to potentially interfere with participant study compliance</li> <li>Prior participation in an investigational HIV vaccine trial, except if proof of allocation to the placebo arm is available</li> <li>Administration of a monoclonal antibody or polyclonal immunoglobulin within 28 days prior to enrolment</li> <li>Any history of anaphylaxis and related symptoms such as hives, respiratory difficulty, or angioedema</li> </ul> | <ul style="list-style-type: none"> <li>Confirmed HIV-1 infection prior to enrolment</li> <li>An HIV viral load of &gt;1000 copies/ml at screening</li> <li>A CD4 count of <math>\geq</math> 450 cells/<math>\mu</math>l at screening</li> <li>ART naive, and willing to defer treatment (after appropriate counselling) for up to a maximum of 8 weeks after product administration</li> <li>No major comorbidities or AIDS-defining illness</li> </ul> |

|                                                                                                                                                                                                                                                                                                                                                                                                                                              |                                                                                                                                                                                                                                                         |  |
|----------------------------------------------------------------------------------------------------------------------------------------------------------------------------------------------------------------------------------------------------------------------------------------------------------------------------------------------------------------------------------------------------------------------------------------------|---------------------------------------------------------------------------------------------------------------------------------------------------------------------------------------------------------------------------------------------------------|--|
| <ul style="list-style-type: none"> <li>• Negative pregnancy test</li> <li>• If of reproductive potential, there is evidence of effective contraceptive use and willingness to adhere to effective contraceptive use during the study period</li> <li>• Willing to have blood samples collected, stored, and used for research purposes.</li> <li>• Willing to adhere to reduced risk sexual behaviour during study participation.</li> </ul> | <ul style="list-style-type: none"> <li>• Evidence of autoimmune disease or currently receiving immunosuppressive therapy</li> <li>• Involvement in other concurrent research studies that would interfere with the objectives of this study.</li> </ul> |  |
|----------------------------------------------------------------------------------------------------------------------------------------------------------------------------------------------------------------------------------------------------------------------------------------------------------------------------------------------------------------------------------------------------------------------------------------------|---------------------------------------------------------------------------------------------------------------------------------------------------------------------------------------------------------------------------------------------------------|--|

\*Additional eligibility criteria for HIV positive participants in Groups 1c and 1d

**Table 2: CAPRISA 012B Group, Dose and Arm Allocation**

| Group                                                              | Participants | Regimen     | SA site<br>N=66  | Dose (mg/kg)                                                 |
|--------------------------------------------------------------------|--------------|-------------|------------------|--------------------------------------------------------------|
| <b>Group 1: Dose escalation of IV administration of CAP256V2LS</b> |              |             |                  |                                                              |
| 1a                                                                 | HIV negative | CAP256V2LS  | 4                | 5 mg/kg IV one dose                                          |
| 1b                                                                 | HIV negative | CAP256V2LS  | 4                | 10 mg/kg IV one dose                                         |
| 1c                                                                 | HIV positive | CAP256V2LS  | 4/2 <sup>§</sup> | 20 mg/kg IV one dose                                         |
| 1d                                                                 | HIV positive | CAP256V2LS  | 4/4 <sup>§</sup> | 20 mg/kg IV one dose                                         |
| <b>Group 2: Dose escalation of SC administration of CAP256V2LS</b> |              |             |                  |                                                              |
| 2a                                                                 | HIV negative | CAP256V2LS  | 4                | 5 mg/kg SC one dose                                          |
| 2b                                                                 | HIV negative | CAP256V2LS* | 4                | 5 mg/kg SC one dose                                          |
| 2c                                                                 | HIV negative | CAP256V2LS* | 4                | 10 mg/kg SC one dose                                         |
| 2d                                                                 | HIV negative | CAP256V2LS* | 4                | 10 mg/kg SC with one repeat dose at 16/24 weeks <sup>#</sup> |
| 2e                                                                 | HIV negative | CAP256V2LS* | 4                | 20 mg/kg SC one dose                                         |
| 2f                                                                 | HIV negative | CAP256V2LS* | 4                | 20 mg/kg SC with one repeat dose at 16/24 weeks <sup>#</sup> |

| <b>Group 3: Dose escalation of the two antibody combinations</b> |              |                                                          |                  |                                                      |
|------------------------------------------------------------------|--------------|----------------------------------------------------------|------------------|------------------------------------------------------|
| 3a                                                               | HIV negative | CAP256V2LS* +<br>VRC07-523.LS*                           | 4/1 <sup>§</sup> | 10 mg/kg SC / 10<br>mg/kg SC one dose                |
| 3b                                                               | HIV negative | CAP256V2LS* +<br>VRC07-523.LS*                           | 4/1 <sup>§</sup> | 20 mg/kg SC / 20<br>mg/kg SC one dose                |
| 3c                                                               | HIV negative | CAP256V2LS* +<br>PGT121 <sup>§</sup>                     | 4/1 <sup>§</sup> | 20 mg/kg SC / 5 mg/kg<br>SC one dose                 |
| <b>Group 4: Three antibody combination</b>                       |              |                                                          |                  |                                                      |
| 4a                                                               | HIV negative | CAP256V2LS* +<br>PGT121 <sup>§</sup> + VRC07-<br>523.LS* | 4/1 <sup>§</sup> | 20 mg/kg SC / 5 mg/kg<br>SC / 20mg/kg SC one<br>dose |

\*Antibody will be injected with hyaluronidase, so that the antibody dose can be administered as a single SC injection; # First two participants will receive two doses 24 weeks apart and the next two participants will receive two doses 16 weeks apart; <sup>§</sup> PGT121 may be replaced with PGT121LS at a higher dose, based on its availability at the time of study initiation, <sup>§</sup> Placebo allocation

**Table 3:** Probability of observing no events, at least 1 event, or at least 2 events, for a range of hypothetical true event rates

| True event rate (%) | Number of participants | 0 events | 1+ events | 2+ events |
|---------------------|------------------------|----------|-----------|-----------|
| 1                   | 4                      | 0.96     | 0.04      | <0.01     |
|                     | 8                      | 0.92     | 0.08      | <0.01     |
|                     | 12                     | 0.89     | 0.11      | 0.01      |
|                     | 16                     | 0.85     | 0.15      | 0.01      |
|                     | 24                     | 0.79     | 0.21      | 0.02      |
|                     | 56                     | 0.57     | 0.43      | 0.11      |
| 5                   | 4                      | 0.81     | 0.19      | 0.01      |
|                     | 8                      | 0.66     | 0.34      | 0.06      |
|                     | 12                     | 0.54     | 0.46      | 0.12      |
|                     | 16                     | 0.44     | 0.56      | 0.19      |
|                     | 24                     | 0.29     | 0.71      | 0.34      |
|                     | 56                     | 0.06     | 0.94      | 0.78      |
| 10                  | 4                      | 0.66     | 0.34      | 0.05      |
|                     | 8                      | 0.43     | 0.57      | 0.19      |
|                     | 12                     | 0.28     | 0.72      | 0.34      |
|                     | 16                     | 0.19     | 0.81      | 0.49      |
|                     | 24                     | 0.08     | 0.92      | 0.71      |

|    |    |       |       |       |
|----|----|-------|-------|-------|
|    | 56 | <0.01 | >0.99 | 0.98  |
| 20 | 4  | 0.41  | 0.59  | 0.18  |
|    | 8  | 0.17  | 0.83  | 0.50  |
|    | 12 | 0.07  | 0.93  | 0.73  |
|    | 16 | 0.03  | 0.97  | 0.86  |
|    | 24 | <0.01 | >0.99 | >0.99 |
|    | 56 | <0.01 | >0.99 | >0.99 |
| 30 | 4  | 0.24  | 0.76  | 0.35  |
|    | 8  | 0.06  | 0.94  | 0.74  |
|    | 12 | 0.01  | 0.99  | 0.91  |
|    | 16 | <0.01 | >0.99 | 0.97  |
|    | 24 | <0.01 | >0.99 | >0.99 |
|    | 56 | <0.01 | >0.99 | >0.99 |

## References

1. UNAIDS. *UNAIDS data 2017*. Geneva, Switzerland: Joint United Nations Programme on HIV/AIDS (UNAIDS), 2017. [http://www.unaids.org/en/resources/documents/2017/2017\\_data\\_book](http://www.unaids.org/en/resources/documents/2017/2017_data_book) (Accessed 01 April 2020).
2. de Oliveira T, Kharsany AB, Gräf T, et al. Transmission networks and risk of HIV infection in KwaZulu-Natal, South Africa: a communitywide phylogenetic study. *Lancet HIV*. 2017;4:e41–e50.
3. Dellar RC, Dlamini S, Karim QA. Adolescent girls and young women: key populations for HIV epidemic control. *Journal of the International AIDS Society*. 2015;18:19408.
4. Abdool Karim SS. HIV-1 Epidemic Control—Insights from Test-and-Treat Trials. *Mass Medical Soc*; 2019; 381:286-288
5. Fang W, Mphoyi BI, Motake DR, Liu J, Li W, Mei F, et al. Efficacy, Adherence and Side Effects of PrEP for HIV-1 Prevention. *International Journal of Biology*. 2019;11(4).
6. Fauci AS, Marston HD. Ending the HIV–AIDS pandemic—follow the science. *New England Journal of Medicine*. 2015;373(23):2197-9.
7. Anderson DJ, Politch JA, Vaca GB, Kadasia K, Whaley KJ. Use of Monoclonal Antibodies to Prevent the Sexual Transmission of Human Immunodeficiency Virus Type 1. *Current Immunology Reviews*. 2019;15(1):123-30.
8. Pegu A, Hessel AJ, Mascola JR, Haigwood NL. Use of broadly neutralizing antibodies for HIV-1 prevention. *Immunological reviews*. 2017;275(1):296-312.
9. Hessel AJ, Poignard P, Hunter M, Hangartner L, Tehrani DM, Bleeker WK, et al. Effective, low-titer antibody protection against low-dose repeated mucosal SHIV challenge in macaques. *Nature medicine*. 2009;15(8):951.
10. Walker LM, Huber M, Doores KJ, Falkowska E, Pejchal R, Julien J-P, et al. Broad neutralization coverage of HIV by multiple highly potent antibodies. *Nature*. 2011;477(7365):466.
11. Moldt B, Rakasz EG, Schultz N, Chan-Hui P-Y, Swiderek K, Weisgrau KL, et al. Highly potent HIV-specific antibody neutralization in vitro translates into effective protection against mucosal SHIV challenge in vivo. *Proceedings of the National Academy of Sciences*. 2012;109(46):18921-5.
12. Barouch DH, Whitney JB, Moldt B, Klein F, Oliveira TY, Liu J, et al. Therapeutic efficacy of potent neutralizing HIV-1-specific monoclonal antibodies in SHIV-infected rhesus monkeys. *Nature*. 2013;503(7475):224.
13. Sok D, Burton DR. Recent progress in broadly neutralizing antibodies to HIV. *Nature immunology*. 2018;19(11):1179.
14. van Loggerenberg F, Mlisana K, Williamson C, Auld SC, Morris L, Gray CM, et al. Establishing a cohort at high risk of HIV infection in South Africa: challenges and experiences of the CAPRISA 002 acute infection study. *PloS one*. 2008;3(4):e1954.
15. Doria-Rose NA, Schramm CA, Gorman J, Moore PL, Bhiman JN, DeKosky BJ, et al. Developmental pathway for potent V1V2-directed HIV-neutralizing antibodies. *Nature*. 2014;509(7498):55.
16. Sheward DJ, Marais J, Bekker V, Murrell B, Eren K, Bhiman JN, et al. HIV superinfection drives de novo antibody responses and not neutralization breadth. *Cell host & microbe*. 2018;24(4):593-9. e3.
17. Wagh K, Bhattacharya T, Williamson C, Robles A, Bayne M, Garrity J, et al. Optimal combinations of broadly neutralizing antibodies for prevention and treatment of HIV-1 clade C infection. *PLoS pathogens*. 2016;12(3):e1005520.
18. Moore PL, Gray ES, Sheward D, Madiga M, Ranchobe N, Lai Z, et al. Potent and broad neutralization of HIV-1 subtype C by plasma antibodies targeting a quaternary epitope including residues in the V2 loop. *Journal of virology*. 2011;85(7):3128-41.
19. Bhiman JN, Anthony C, Doria-Rose NA, Karimanzira O, Schramm CA, Khoza T, et al. Viral variants that initiate and drive maturation of V1V2-directed HIV-1 broadly neutralizing antibodies. *Nature medicine*. 2015;21(11):1332.
20. Doria-Rose NA, Bhiman JN, Roark RS, Schramm CA, Gorman J, Chuang G-Y, et al. New member of the V1V2-directed CAP256-VRC26 lineage that shows increased breadth and exceptional potency. *Journal of virology*. 2016;90(1):76-91.
21. Gorman J, Chuang G-Y, Lai Y-T, Shen C-H, Boyington JC, Druz A, et al. Structure of Super-Potent Antibody CAP256-VRC26. 25 in Complex with HIV-1 Envelope Reveals a Combined Mode of Trimer-Apex Recognition. *Cell Reports*. 2020;31(1):107488.
22. Gaudinski MR, Coates EE, Houser KV, Chen GL, Yamshchikov G, Saunders JG, et al. Safety and pharmacokinetics of the Fc-modified HIV-1 human monoclonal antibody VRC01LS: a phase 1 open-label clinical trial in healthy adults. *PLoS medicine*. 2018;15(1):e1002493.

- 1  
2  
3 23. Julg B, Tartaglia LJ, Keele BF, Wagh K, Pegu A, Sok D, et al. Broadly neutralizing antibodies  
4 targeting the HIV-1 envelope V2 apex confer protection against a clade C SHIV challenge. *Science*  
5 *translational medicine*. 2017;9(406):eaal1321.
- 6 24. Pegu A, Borate B, Huang Y, Pauthner MG, Hessel AJ, Julg B, et al. A Meta-analysis of Passive  
7 Immunization Studies Shows that Serum-Neutralizing Antibody Titer Associates with Protection against  
8 SHIV Challenge. *Cell Host & Microbe*. 2019;26(3):336-46. e3.
- 9 25. Ivleva VB, Schneck NA, Gollapudi D, Arnold F, Cooper JW, Lei QP. Investigation of sequence  
10 clipping and structural heterogeneity of an HIV broadly neutralizing antibody by a comprehensive LC-  
11 MS analysis. *Journal of The American Society for Mass Spectrometry*. 2018;29(7):1512-23.
- 12 26. Investigator's Brochure CAP256V2LS (VRC-HIVMAB0102-00-AB) A Broadly Neutralizing HIV-  
13 1 Human Monoclonal Antibody. Version 10 dated 12 February 2020 , Vaccine Research Centre.
- 14 27. Mahomed S, Garrett N, Capparelli E, Baxter C, Zuma NY, Gengiah T, et al. Assessing the  
15 safety and pharmacokinetics of the monoclonal antibodies, VRC07-523LS and PGT121 in HIV negative  
16 women in South Africa: study protocol for the CAPRISA 012A randomised controlled phase I trial. *BMJ*  
17 *open*. 2019;9(7):e030283.
- 18 28. Gaudinski MR, Houser KV, Doria-Rose NA, Chen GL, Rothwell RSS, Berkowitz N, et al. Safety  
19 and pharmacokinetics of broadly neutralising human monoclonal antibody VRC07-523LS in healthy  
20 adults: a phase 1 dose-escalation clinical trial. *The Lancet HIV*. 2019;6(10):e667-e79.
- 21 29. Stephenson K, Julg B, Ansel J, Walsh S, Tan C, Maxfield L, et al., editors. Therapeutic activity  
22 of PGT121 monoclonal antibody in HIV-infected adults. Conference on Retroviruses and Opportunistic  
23 Infections; Seattle, Washington; 2019.
- 24 30. Locke KW, Maneval DC, LaBarre MJ. ENHANZE® drug delivery technology: a novel approach  
25 to subcutaneous administration using recombinant human hyaluronidase PH20. *Drug delivery*.  
26 2019;26(1):98-106.
- 27 31. Archary D, Liebenberg LJ, Werner L, Tulsi S, Majola N, Naicker N, et al. Randomized cross-  
28 sectional study to compare HIV-1 specific antibody and cytokine concentrations in female genital  
29 secretions obtained by menstrual cup and cervicovaginal lavage. *PloS one*. 2015;10(7).
- 30 32. Peluso MJ, Dee L, Campbell D, Taylor J, Hoh R, Rutishauser RL, et al. A collaborative,  
31 multidisciplinary approach to HIV transmission risk mitigation during analytic treatment interruption.  
32 *Journal of Virus Eradication*. 2020;6(1):34.
- 33 33. Julg B, Dee L, Ananworanich J, Barouch DH, Bar K, Caskey M, et al. Recommendations for  
34 analytical antiretroviral treatment interruptions in HIV research trials—report of a consensus meeting.  
35 *Lancet HIV*. 2019; 6(4), pp.e259-e268.
- 36  
37  
38  
39  
40  
41  
42  
43  
44  
45  
46  
47  
48  
49  
50  
51  
52  
53  
54  
55  
56  
57  
58  
59  
60



1  
2  
3  
4  
5  
6  
7  
8  
9  
10 **CAPRISA 012A:** Phase I study to assess safety and PK of **VRC07-523LS**  
11 and **PGT121** administered subcutaneously in HIV-negative women  
12

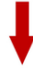

13  
14  
15  
16  
17 **CAPRISA 012B:** Phase I Dose-Escalation study to assess the safety and  
18 PK of **CAP256V2LS** administered intravenously to HIV-negative and HIV-  
19 positive women or subcutaneously alone and in combination with **VRC07-**  
20 **523LS** and /or **PGT121** to HIV-negative women  
21  
22  
23

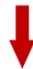

24  
25  
26  
27 **CAPRISA 012C:** Phase II study to assess extended safety and PK of  
28 subcutaneously-administered **CAP256V2LS** in combination with **VRC07-**  
29 **523LS** and /or **CAP256V2LS** in combination with **PGT121** in HIV-negative  
30 women  
31  
32  
33  
34

35  
36  
37  
38  
39 Figure 1: CAPRISA 012 Clinical Trial Programme  
40  
41  
42  
43  
44  
45  
46  
47  
48  
49  
50  
51  
52  
53  
54  
55  
56  
57  
58  
59  
60

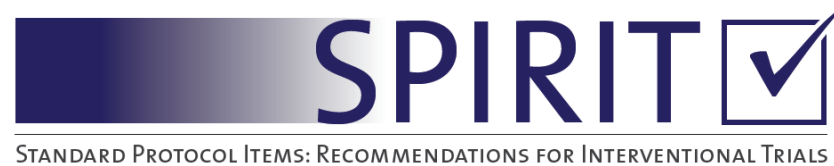

SPIRIT 2013 Checklist: Recommended items to address in a clinical trial protocol and related documents\*

| Section/item                      | Item No | Description                                                                                                                                                                                                                                                                              | Addressed on page number                                                               |
|-----------------------------------|---------|------------------------------------------------------------------------------------------------------------------------------------------------------------------------------------------------------------------------------------------------------------------------------------------|----------------------------------------------------------------------------------------|
| <b>Administrative information</b> |         |                                                                                                                                                                                                                                                                                          |                                                                                        |
| Title                             | 1       | Descriptive title identifying the study design, population, interventions, and, if applicable, trial acronym                                                                                                                                                                             | 1                                                                                      |
| Trial registration                | 2a      | Trial identifier and registry name. If not yet registered, name of intended registry                                                                                                                                                                                                     | 33                                                                                     |
|                                   | 2b      | All items from the World Health Organization Trial Registration Data Set                                                                                                                                                                                                                 | 1-13;<br>Registered on the Pan African Clinical Trial Registry (PACTR202003 767867253) |
| Protocol version                  | 3       | Date and version identifier                                                                                                                                                                                                                                                              | 1-35                                                                                   |
| Funding                           | 4       | Sources and types of financial, material, and other support                                                                                                                                                                                                                              | 3                                                                                      |
| Roles and responsibilities        | 5a      | Names, affiliations, and roles of protocol contributors                                                                                                                                                                                                                                  | 2                                                                                      |
|                                   | 5b      | Name and contact information for the trial sponsor                                                                                                                                                                                                                                       | 1                                                                                      |
|                                   | 5c      | Role of study sponsor and funders, if any, in study design; collection, management, analysis, and interpretation of data; writing of the report; and the decision to submit the report for publication, including whether they will have ultimate authority over any of these activities | N/A<br>The applicant is the sponsor                                                    |

|    |                                                           |     |                                                                                                                                                                                                                                                                  |        |
|----|-----------------------------------------------------------|-----|------------------------------------------------------------------------------------------------------------------------------------------------------------------------------------------------------------------------------------------------------------------|--------|
| 1  |                                                           | 5d  | Composition, roles, and responsibilities of the coordinating centre, steering committee, endpoint adjudication committee, data management team, and other individuals or groups overseeing the trial, if applicable (see Item 21a for data monitoring committee) | 26-27  |
| 2  |                                                           |     |                                                                                                                                                                                                                                                                  |        |
| 3  |                                                           |     |                                                                                                                                                                                                                                                                  |        |
| 4  |                                                           |     |                                                                                                                                                                                                                                                                  |        |
| 5  |                                                           |     |                                                                                                                                                                                                                                                                  |        |
| 6  |                                                           |     |                                                                                                                                                                                                                                                                  |        |
| 7  |                                                           |     |                                                                                                                                                                                                                                                                  |        |
| 8  |                                                           |     |                                                                                                                                                                                                                                                                  |        |
| 9  | <b>Introduction</b>                                       |     |                                                                                                                                                                                                                                                                  |        |
| 10 |                                                           |     |                                                                                                                                                                                                                                                                  |        |
| 11 | Background and rationale                                  | 6a  | Description of research question and justification for undertaking the trial, including summary of relevant studies (published and unpublished) examining benefits and harms for each intervention                                                               | 7-12   |
| 12 |                                                           |     |                                                                                                                                                                                                                                                                  |        |
| 13 |                                                           |     |                                                                                                                                                                                                                                                                  |        |
| 14 |                                                           | 6b  | Explanation for choice of comparators                                                                                                                                                                                                                            | 22-23  |
| 15 |                                                           |     |                                                                                                                                                                                                                                                                  |        |
| 16 | Objectives                                                | 7   | Specific objectives or hypotheses                                                                                                                                                                                                                                | 12-13  |
| 17 |                                                           |     |                                                                                                                                                                                                                                                                  |        |
| 18 | Trial design                                              | 8   | Description of trial design including type of trial (eg, parallel group, crossover, factorial, single group), allocation ratio, and framework (eg, superiority, equivalence, noninferiority, exploratory)                                                        | 13-16  |
| 19 |                                                           |     |                                                                                                                                                                                                                                                                  |        |
| 20 |                                                           |     |                                                                                                                                                                                                                                                                  |        |
| 21 |                                                           |     |                                                                                                                                                                                                                                                                  |        |
| 22 | <b>Methods: Participants, interventions, and outcomes</b> |     |                                                                                                                                                                                                                                                                  |        |
| 23 |                                                           |     |                                                                                                                                                                                                                                                                  |        |
| 24 | Study setting                                             | 9   | Description of study settings (eg, community clinic, academic hospital) and list of countries where data will be collected. Reference to where list of study sites can be obtained                                                                               | 16     |
| 25 |                                                           |     |                                                                                                                                                                                                                                                                  |        |
| 26 |                                                           |     |                                                                                                                                                                                                                                                                  |        |
| 27 | Eligibility criteria                                      | 10  | Inclusion and exclusion criteria for participants. If applicable, eligibility criteria for study centres and individuals who will perform the interventions (eg, surgeons, psychotherapists)                                                                     | 16-17  |
| 28 |                                                           |     |                                                                                                                                                                                                                                                                  |        |
| 29 |                                                           |     |                                                                                                                                                                                                                                                                  |        |
| 30 | Interventions                                             | 11a | Interventions for each group with sufficient detail to allow replication, including how and when they will be administered                                                                                                                                       | 13-15  |
| 31 |                                                           |     |                                                                                                                                                                                                                                                                  |        |
| 32 |                                                           | 11b | Criteria for discontinuing or modifying allocated interventions for a given trial participant (eg, drug dose change in response to harms, participant request, or improving/worsening disease)                                                                   | 15,20  |
| 33 |                                                           |     |                                                                                                                                                                                                                                                                  |        |
| 34 |                                                           | 11c | Strategies to improve adherence to intervention protocols, and any procedures for monitoring adherence (eg, drug tablet return, laboratory tests)                                                                                                                | 16, 20 |
| 35 |                                                           |     |                                                                                                                                                                                                                                                                  |        |
| 36 |                                                           |     |                                                                                                                                                                                                                                                                  |        |
| 37 |                                                           | 11d | Relevant concomitant care and interventions that are permitted or prohibited during the trial                                                                                                                                                                    | 18-19  |
| 38 |                                                           |     |                                                                                                                                                                                                                                                                  |        |
| 39 |                                                           |     |                                                                                                                                                                                                                                                                  |        |
| 40 |                                                           |     |                                                                                                                                                                                                                                                                  |        |
| 41 |                                                           |     |                                                                                                                                                                                                                                                                  |        |
| 42 |                                                           |     |                                                                                                                                                                                                                                                                  |        |

|    |                                                                     |     |                                                                                                                                                                                                                                                                                                                                                                                |                                              |
|----|---------------------------------------------------------------------|-----|--------------------------------------------------------------------------------------------------------------------------------------------------------------------------------------------------------------------------------------------------------------------------------------------------------------------------------------------------------------------------------|----------------------------------------------|
| 1  | Outcomes                                                            | 12  | Primary, secondary, and other outcomes, including the specific measurement variable (eg, systolic blood pressure), analysis metric (eg, change from baseline, final value, time to event), method of aggregation (eg, median, proportion), and time point for each outcome. Explanation of the clinical relevance of chosen efficacy and harm outcomes is strongly recommended | 13                                           |
| 2  |                                                                     |     |                                                                                                                                                                                                                                                                                                                                                                                |                                              |
| 3  |                                                                     |     |                                                                                                                                                                                                                                                                                                                                                                                |                                              |
| 4  |                                                                     |     |                                                                                                                                                                                                                                                                                                                                                                                |                                              |
| 5  |                                                                     |     |                                                                                                                                                                                                                                                                                                                                                                                |                                              |
| 6  | Participant timeline                                                | 13  | Time schedule of enrolment, interventions (including any run-ins and washouts), assessments, and visits for participants. A schematic diagram is highly recommended (see Figure)                                                                                                                                                                                               | Schedule of Evaluations for each study group |
| 7  |                                                                     |     |                                                                                                                                                                                                                                                                                                                                                                                |                                              |
| 8  |                                                                     |     |                                                                                                                                                                                                                                                                                                                                                                                |                                              |
| 9  |                                                                     |     |                                                                                                                                                                                                                                                                                                                                                                                |                                              |
| 10 |                                                                     |     |                                                                                                                                                                                                                                                                                                                                                                                |                                              |
| 11 |                                                                     |     |                                                                                                                                                                                                                                                                                                                                                                                |                                              |
| 12 | Sample size                                                         | 14  | Estimated number of participants needed to achieve study objectives and how it was determined, including clinical and statistical assumptions supporting any sample size calculations                                                                                                                                                                                          | 27-29                                        |
| 13 |                                                                     |     |                                                                                                                                                                                                                                                                                                                                                                                |                                              |
| 14 |                                                                     |     |                                                                                                                                                                                                                                                                                                                                                                                |                                              |
| 15 | Recruitment                                                         | 15  | Strategies for achieving adequate participant enrolment to reach target sample size                                                                                                                                                                                                                                                                                            | 17-18                                        |
| 16 |                                                                     |     |                                                                                                                                                                                                                                                                                                                                                                                |                                              |
| 17 |                                                                     |     |                                                                                                                                                                                                                                                                                                                                                                                |                                              |
| 18 | <b>Methods: Assignment of interventions (for controlled trials)</b> |     |                                                                                                                                                                                                                                                                                                                                                                                |                                              |
| 19 |                                                                     |     |                                                                                                                                                                                                                                                                                                                                                                                |                                              |
| 20 | Allocation:                                                         |     |                                                                                                                                                                                                                                                                                                                                                                                |                                              |
| 21 |                                                                     |     |                                                                                                                                                                                                                                                                                                                                                                                |                                              |
| 22 | Sequence generation                                                 | 16a | Method of generating the allocation sequence (eg, computer-generated random numbers), and list of any factors for stratification. To reduce predictability of a random sequence, details of any planned restriction (eg, blocking) should be provided in a separate document that is unavailable to those who enrol participants or assign interventions                       | 13-14,19                                     |
| 23 |                                                                     |     |                                                                                                                                                                                                                                                                                                                                                                                |                                              |
| 24 |                                                                     |     |                                                                                                                                                                                                                                                                                                                                                                                |                                              |
| 25 |                                                                     |     |                                                                                                                                                                                                                                                                                                                                                                                |                                              |
| 26 |                                                                     |     |                                                                                                                                                                                                                                                                                                                                                                                |                                              |
| 27 |                                                                     |     |                                                                                                                                                                                                                                                                                                                                                                                |                                              |
| 28 | Allocation concealment mechanism                                    | 16b | Mechanism of implementing the allocation sequence (eg, central telephone; sequentially numbered, opaque, sealed envelopes), describing any steps to conceal the sequence until interventions are assigned                                                                                                                                                                      | 19, 20, 23                                   |
| 29 |                                                                     |     |                                                                                                                                                                                                                                                                                                                                                                                |                                              |
| 30 |                                                                     |     |                                                                                                                                                                                                                                                                                                                                                                                |                                              |
| 31 |                                                                     |     |                                                                                                                                                                                                                                                                                                                                                                                |                                              |
| 32 | Implementation                                                      | 16c | Who will generate the allocation sequence, who will enrol participants, and who will assign participants to interventions                                                                                                                                                                                                                                                      | 23                                           |
| 33 |                                                                     |     |                                                                                                                                                                                                                                                                                                                                                                                |                                              |
| 34 |                                                                     |     |                                                                                                                                                                                                                                                                                                                                                                                |                                              |
| 35 | Blinding (masking)                                                  | 17a | Who will be blinded after assignment to interventions (eg, trial participants, care providers, outcome assessors, data analysts), and how                                                                                                                                                                                                                                      | 23                                           |
| 36 |                                                                     |     |                                                                                                                                                                                                                                                                                                                                                                                |                                              |
| 37 |                                                                     |     |                                                                                                                                                                                                                                                                                                                                                                                |                                              |
| 38 |                                                                     | 17b | If blinded, circumstances under which unblinding is permissible, and procedure for revealing a participant's allocated intervention during the trial                                                                                                                                                                                                                           | 23                                           |
| 39 |                                                                     |     |                                                                                                                                                                                                                                                                                                                                                                                |                                              |
| 40 |                                                                     |     |                                                                                                                                                                                                                                                                                                                                                                                |                                              |
| 41 |                                                                     |     |                                                                                                                                                                                                                                                                                                                                                                                |                                              |
| 42 |                                                                     |     |                                                                                                                                                                                                                                                                                                                                                                                |                                              |
| 43 |                                                                     |     |                                                                                                                                                                                                                                                                                                                                                                                |                                              |
| 44 |                                                                     |     |                                                                                                                                                                                                                                                                                                                                                                                |                                              |
| 45 |                                                                     |     |                                                                                                                                                                                                                                                                                                                                                                                |                                              |
| 46 |                                                                     |     |                                                                                                                                                                                                                                                                                                                                                                                |                                              |

## Methods: Data collection, management, and analysis

|                         |     |                                                                                                                                                                                                                                                                                                                                                                                                              |             |
|-------------------------|-----|--------------------------------------------------------------------------------------------------------------------------------------------------------------------------------------------------------------------------------------------------------------------------------------------------------------------------------------------------------------------------------------------------------------|-------------|
| Data collection methods | 18a | Plans for assessment and collection of outcome, baseline, and other trial data, including any related processes to promote data quality (eg, duplicate measurements, training of assessors) and a description of study instruments (eg, questionnaires, laboratory tests) along with their reliability and validity, if known. Reference to where data collection forms can be found, if not in the protocol | 29-30       |
|                         | 18b | Plans to promote participant retention and complete follow-up, including list of any outcome data to be collected for participants who discontinue or deviate from intervention protocols                                                                                                                                                                                                                    | 20,26,27,32 |
| Data management         | 19  | Plans for data entry, coding, security, and storage, including any related processes to promote data quality (eg, double data entry; range checks for data values). Reference to where details of data management procedures can be found, if not in the protocol                                                                                                                                            | 30-31       |
| Statistical methods     | 20a | Statistical methods for analysing primary and secondary outcomes. Reference to where other details of the statistical analysis plan can be found, if not in the protocol                                                                                                                                                                                                                                     | 29-30       |
|                         | 20b | Methods for any additional analyses (eg, subgroup and adjusted analyses)                                                                                                                                                                                                                                                                                                                                     | 29-30       |
|                         | 20c | Definition of analysis population relating to protocol non-adherence (eg, as randomised analysis), and any statistical methods to handle missing data (eg, multiple imputation)                                                                                                                                                                                                                              | N/A         |

## Methods: Monitoring

|                 |     |                                                                                                                                                                                                                                                                                                                                       |             |
|-----------------|-----|---------------------------------------------------------------------------------------------------------------------------------------------------------------------------------------------------------------------------------------------------------------------------------------------------------------------------------------|-------------|
| Data monitoring | 21a | Composition of data monitoring committee (DMC); summary of its role and reporting structure; statement of whether it is independent from the sponsor and competing interests; and reference to where further details about its charter can be found, if not in the protocol. Alternatively, an explanation of why a DMC is not needed | 26-27       |
|                 | 21b | Description of any interim analyses and stopping guidelines, including who will have access to these interim results and make the final decision to terminate the trial                                                                                                                                                               | 15,16,26,27 |
| Harms           | 22  | Plans for collecting, assessing, reporting, and managing solicited and spontaneously reported adverse events and other unintended effects of trial interventions or trial conduct                                                                                                                                                     | 24-26       |
| Auditing        | 23  | Frequency and procedures for auditing trial conduct, if any, and whether the process will be independent from investigators and the sponsor                                                                                                                                                                                           | 27          |

## 1 **Ethics and dissemination**

|    |                      |     |                                                                                                                 |     |
|----|----------------------|-----|-----------------------------------------------------------------------------------------------------------------|-----|
| 2  |                      |     |                                                                                                                 |     |
| 3  | Research ethics      | 24  | Plans for seeking research ethics committee/institutional review board (REC/IRB) approval                       | 31  |
| 4  | approval             |     |                                                                                                                 |     |
| 5  |                      |     |                                                                                                                 |     |
| 6  | Protocol             | 25  | Plans for communicating important protocol modifications (eg, changes to eligibility criteria, outcomes,        | 31  |
| 7  | amendments           |     | analyses) to relevant parties (eg, investigators, REC/IRBs, trial participants, trial registries, journals,     |     |
| 8  |                      |     | regulators)                                                                                                     |     |
| 9  |                      |     |                                                                                                                 |     |
| 10 |                      |     |                                                                                                                 |     |
| 11 | Consent or assent    | 26a | Who will obtain informed consent or assent from potential trial participants or authorised surrogates, and      | 31  |
| 12 |                      |     | how (see Item 32)                                                                                               |     |
| 13 |                      |     |                                                                                                                 |     |
| 14 |                      | 26b | Additional consent provisions for collection and use of participant data and biological specimens in ancillary  | 31  |
| 15 |                      |     | studies, if applicable                                                                                          |     |
| 16 |                      |     |                                                                                                                 |     |
| 17 | Confidentiality      | 27  | How personal information about potential and enrolled participants will be collected, shared, and maintained    | 33  |
| 18 |                      |     | in order to protect confidentiality before, during, and after the trial                                         |     |
| 19 |                      |     |                                                                                                                 |     |
| 20 | Declaration of       | 28  | Financial and other competing interests for principal investigators for the overall trial and each study site   | 2-3 |
| 21 | interests            |     |                                                                                                                 |     |
| 22 |                      |     |                                                                                                                 |     |
| 23 |                      |     |                                                                                                                 |     |
| 24 | Access to data       | 29  | Statement of who will have access to the final trial dataset, and disclosure of contractual agreements that     | 33  |
| 25 |                      |     | limit such access for investigators                                                                             |     |
| 26 |                      |     |                                                                                                                 |     |
| 27 | Ancillary and post-  | 30  | Provisions, if any, for ancillary and post-trial care, and for compensation to those who suffer harm from trial | 18  |
| 28 | trial care           |     | participation                                                                                                   |     |
| 29 |                      |     |                                                                                                                 |     |
| 30 | Dissemination policy | 31a | Plans for investigators and sponsor to communicate trial results to participants, healthcare professionals,     | 33  |
| 31 |                      |     | the public, and other relevant groups (eg, via publication, reporting in results databases, or other data       |     |
| 32 |                      |     | sharing arrangements), including any publication restrictions                                                   |     |
| 33 |                      |     |                                                                                                                 |     |
| 34 |                      |     |                                                                                                                 |     |
| 35 |                      | 31b | Authorship eligibility guidelines and any intended use of professional writers                                  | N/A |
| 36 |                      |     |                                                                                                                 |     |
| 37 |                      | 31c | Plans, if any, for granting public access to the full protocol, participant-level dataset, and statistical code | 33  |
| 38 |                      |     |                                                                                                                 |     |

## 39 **Appendices**

|   |                  |    |                                                                                                           |    |
|---|------------------|----|-----------------------------------------------------------------------------------------------------------|----|
| 1 | Informed consent | 32 | Model consent form and other related documentation given to participants and authorised surrogates        | 31 |
| 2 | materials        |    |                                                                                                           |    |
| 3 |                  |    |                                                                                                           |    |
| 4 | Biological       | 33 | Plans for collection, laboratory evaluation, and storage of biological specimens for genetic or molecular | 21 |
| 5 | specimens        |    | analysis in the current trial and for future use in ancillary studies, if applicable                      |    |
| 6 |                  |    |                                                                                                           |    |

---

7 \*It is strongly recommended that this checklist be read in conjunction with the SPIRIT 2013 Explanation & Elaboration for important clarification on the items.  
8 Amendments to the protocol should be tracked and dated. The SPIRIT checklist is copyrighted by the SPIRIT Group under the Creative Commons  
9 "[Attribution-NonCommercial-NoDerivs 3.0 Unported](#)" license.  
10  
11  
12  
13  
14  
15  
16  
17  
18  
19  
20  
21  
22  
23  
24  
25  
26  
27  
28  
29  
30  
31  
32  
33  
34  
35  
36  
37  
38  
39  
40  
41  
42  
43  
44  
45  
46

For peer review only

# BMJ Open

## Assessing the safety and pharmacokinetics of the anti-HIV monoclonal antibody CAP256V2LS alone and in combination with VRC07-523LS and PGT121 in South African women: study protocol for the first-in-human CAPRISA 012B phase I clinical trial

|                                 |                                                                                                                                                                                                                                                                                                                                                                                                                                                                                                                                                                                                                                                                                                                                                                                                                                                                                                                                                                                                                                                                                                                                                                                                                                                                                                                                                                                                                                                                                                           |
|---------------------------------|-----------------------------------------------------------------------------------------------------------------------------------------------------------------------------------------------------------------------------------------------------------------------------------------------------------------------------------------------------------------------------------------------------------------------------------------------------------------------------------------------------------------------------------------------------------------------------------------------------------------------------------------------------------------------------------------------------------------------------------------------------------------------------------------------------------------------------------------------------------------------------------------------------------------------------------------------------------------------------------------------------------------------------------------------------------------------------------------------------------------------------------------------------------------------------------------------------------------------------------------------------------------------------------------------------------------------------------------------------------------------------------------------------------------------------------------------------------------------------------------------------------|
| Journal:                        | <i>BMJ Open</i>                                                                                                                                                                                                                                                                                                                                                                                                                                                                                                                                                                                                                                                                                                                                                                                                                                                                                                                                                                                                                                                                                                                                                                                                                                                                                                                                                                                                                                                                                           |
| Manuscript ID                   | bmjopen-2020-042247.R1                                                                                                                                                                                                                                                                                                                                                                                                                                                                                                                                                                                                                                                                                                                                                                                                                                                                                                                                                                                                                                                                                                                                                                                                                                                                                                                                                                                                                                                                                    |
| Article Type:                   | Protocol                                                                                                                                                                                                                                                                                                                                                                                                                                                                                                                                                                                                                                                                                                                                                                                                                                                                                                                                                                                                                                                                                                                                                                                                                                                                                                                                                                                                                                                                                                  |
| Date Submitted by the Author:   | 23-Sep-2020                                                                                                                                                                                                                                                                                                                                                                                                                                                                                                                                                                                                                                                                                                                                                                                                                                                                                                                                                                                                                                                                                                                                                                                                                                                                                                                                                                                                                                                                                               |
| Complete List of Authors:       | <p>Mahomed, Sharana; Centre for the Aids Programme of Research in South Africa,<br/> Garrett, Nigel; CAPRISA<br/> Karim, Quarraisha Abdool; CAPRISA; Columbia University, Department of Epidemiology, Mailman School of Public Health<br/> Zuma, Nonhlanhla ; CAPRISA<br/> capparelli, edmund; University of California San Diego<br/> Baxter, Cheryl; CAPRISA<br/> Gengiah, Tanuja; CAPRISA<br/> Archary, Derseree; CAPRISA<br/> Samsunder, Natasha; Centre for the Aids Programme of Research in South Africa<br/> Rose, Nicole; National Institutes of Health<br/> Moore, Penny; CAPRISA; National Institute for Communicable Diseases<br/> Williamson, Carolyn; University of Cape Town, Division of Medical Virology, Institute of Infectious Disease and Molecular Medicine; National Health Laboratory Service<br/> Barouch, Dan; Beth Israel Deaconess Medical Center, Center for Virology and Vaccine Research, Br, Boston, USA<br/> Fast, Patricia; International Aids Vaccine Initiative<br/> Pozzetto, Bruno; Saint-Etienne University Hospital Centre Geriatrics and Internal Medicine Section<br/> Hankins, Catherine; AIGHD, Amsterdam Institute for Global Health and Development<br/> Carlton, Kevin; National Institutes of Health<br/> Ledgerwood, Julie; NIH<br/> Morris, Lynn; National Institute for Communicable Diseases; CAPRISA<br/> Mascola, John; NIH<br/> Abdool Karim, Salim; CAPRISA; Columbia University, Department of Epidemiology, Mailman School of Public Health</p> |
| <b>Primary Subject Heading</b>: | HIV/AIDS                                                                                                                                                                                                                                                                                                                                                                                                                                                                                                                                                                                                                                                                                                                                                                                                                                                                                                                                                                                                                                                                                                                                                                                                                                                                                                                                                                                                                                                                                                  |
| Secondary Subject Heading:      | Infectious diseases, Epidemiology, Immunology (including allergy)                                                                                                                                                                                                                                                                                                                                                                                                                                                                                                                                                                                                                                                                                                                                                                                                                                                                                                                                                                                                                                                                                                                                                                                                                                                                                                                                                                                                                                         |
| Keywords:                       | INFECTIOUS DISEASES, HIV & AIDS < INFECTIOUS DISEASES,                                                                                                                                                                                                                                                                                                                                                                                                                                                                                                                                                                                                                                                                                                                                                                                                                                                                                                                                                                                                                                                                                                                                                                                                                                                                                                                                                                                                                                                    |



1  
2  
3  
4  
5  
6  
7  
8  
9  
10  
11  
12  
13  
14  
15  
16  
17  
18  
19  
20  
21  
22  
23  
24  
25  
26  
27  
28  
29  
30  
31  
32  
33  
34  
35  
36  
37  
38  
39  
40  
41  
42  
43  
44  
45  
46  
47  
48  
49  
50  
51  
52  
53  
54  
55  
56  
57  
58  
59  
60

|  |                                                                                                      |
|--|------------------------------------------------------------------------------------------------------|
|  | Microbiology < PATHOLOGY, Public health < INFECTIOUS DISEASES,<br>Epidemiology < INFECTIOUS DISEASES |
|  |                                                                                                      |

SCHOLARONE™  
Manuscripts

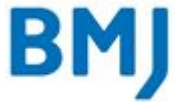

I, the Submitting Author has the right to grant and does grant on behalf of all authors of the Work (as defined in the below author licence), an exclusive licence and/or a non-exclusive licence for contributions from authors who are: i) UK Crown employees; ii) where BMJ has agreed a CC-BY licence shall apply, and/or iii) in accordance with the terms applicable for US Federal Government officers or employees acting as part of their official duties; on a worldwide, perpetual, irrevocable, royalty-free basis to BMJ Publishing Group Ltd ("BMJ") its licensees and where the relevant Journal is co-owned by BMJ to the co-owners of the Journal, to publish the Work in this journal and any other BMJ products and to exploit all rights, as set out in our [licence](#).

The Submitting Author accepts and understands that any supply made under these terms is made by BMJ to the Submitting Author unless you are acting as an employee on behalf of your employer or a postgraduate student of an affiliated institution which is paying any applicable article publishing charge ("APC") for Open Access articles. Where the Submitting Author wishes to make the Work available on an Open Access basis (and intends to pay the relevant APC), the terms of reuse of such Open Access shall be governed by a Creative Commons licence – details of these licences and which [Creative Commons](#) licence will apply to this Work are set out in our licence referred to above.

Other than as permitted in any relevant BMJ Author's Self Archiving Policies, I confirm this Work has not been accepted for publication elsewhere, is not being considered for publication elsewhere and does not duplicate material already published. I confirm all authors consent to publication of this Work and authorise the granting of this licence.

## Protocol Paper - CAPRISA 012B

### Title

Assessing the safety and pharmacokinetics of the anti-HIV monoclonal antibody CAP256V2LS alone and in combination with VRC07-523LS and PGT121 in South African women: study protocol for the first-in-human CAPRISA 012B phase I clinical trial

### Authors

Sharana Mahomed<sup>1</sup>, Nigel Garrett<sup>1,2</sup>, Quarraisha Abdool Karim<sup>1,3</sup>, Nonhlanhla Yende-Zuma<sup>1</sup>, Edmund Capparelli<sup>4</sup>, Cheryl Baxter<sup>1</sup>, Tanuja N. Gengiah<sup>1</sup>, Derseree Archary<sup>1</sup>, Natasha Samsunder<sup>1</sup>, Nicole A. Doria-Rose<sup>5</sup>, Penny L. Moore<sup>1,6</sup>, Carolyn Williamson<sup>1, 7, 8</sup>, Dan H Barouch<sup>9</sup>, Patricia E Fast<sup>10</sup>, Bruno Pozzetto<sup>11</sup>, Catherine A. Hankins<sup>12</sup>, Kevin Carlton<sup>5</sup>, Julie E. Ledgerwood<sup>5</sup>, Lynn Morris<sup>1,6</sup>, John R. Mascola<sup>5</sup>, Salim S. Abdool Karim<sup>1,3</sup>

### Author affiliations

1. Centre for the AIDS Programme of Research in South Africa (CAPRISA), Durban, South Africa
2. Department of Public Health Medicine, School of Nursing and Public Health, University of KwaZulu-Natal, Durban, South Africa
3. Department of Epidemiology, Mailman School of Public Health, Columbia University, New York, USA
4. University of California San Diego, San Diego, California, USA
5. Vaccine Research Center, National Institutes of Health, Bethesda, Maryland, USA
6. National Institute for Communicable Diseases of the National Health Laboratory Services, Johannesburg, South Africa
7. Division of Medical Virology, Institute of Infectious Disease and Molecular Medicine, University of Cape Town, Cape Town, South Africa.
8. National Health Laboratory Services of South Africa
9. Center for Virology and Vaccine Research, Beth Israel Deaconess Medical Center, Boston, USA
10. International AIDS Vaccine Initiative, New York, New York, USA
11. GIMAP (EA3064), University of Saint-Etienne/University of Lyon, Saint-Etienne, France
12. Amsterdam Institute for Global Health and Development

### Corresponding Author

Sharana Mahomed

1  
2  
3 Address: Centre for the AIDS Programme of Research in South Africa (CAPRISA), 3  
4 University Avenue, Durban, South Africa  
5  
6 Telephone number: 031 655 0610  
7  
8 Cell Number: 0813189848  
9  
10 Email address: [Sharana.Mahomed@caprisa.org](mailto:Sharana.Mahomed@caprisa.org)  
11

12 **Abstract:** (297/300)  
13

### 14 **Introduction**

15  
16 New HIV prevention strategies are urgently required. The discovery of broadly neutralizing  
17 antibodies (bNAbs) has provided the opportunity to evaluate passive immunisation as a  
18 potential prevention strategy and facilitate vaccine development. Since 2014, several bNAbs  
19 have been isolated from a clade C infected South African donor, CAPRISA256. One  
20 particular bNAb, CAP256-VRC26.25, was found to be extremely potent, with good coverage  
21 against clade C viruses, the dominant HIV clade in sub-Saharan Africa. Challenge studies in  
22 non-human primates demonstrated that this antibody was fully protective even at extremely  
23 low doses. This bNAb was subsequently structurally engineered and the clinical variant is  
24 now referred to as CAP256V2LS.  
25  
26  
27  
28  
29  
30  
31  
32

### 33 **Methods and analysis**

34  
35 CAPRISA 012B is the second of three trials in the CAPRISA 012 bNAb trial programme. It is  
36 a first-in-human, phase I study to assess the safety and pharmacokinetics of CAP256V2LS.  
37 The study is divided into four groups. Group 1 is a dose escalation of CAP256V2LS  
38 administered intravenously (IV) to HIV-negative and HIV-positive women. Group 2 is a dose  
39 escalation of CAP256V2LS administered subcutaneously (SC), with and without the  
40 dispersing agent recombinant human hyaluronidase (rHuPH20) as single or repeat doses in  
41 HIV-negative women. Groups 3 and 4 are randomized placebo controlled to assess two  
42 (CAP256V2LS + VRC07-523LS; CAP256V2LS + PGT121) and three (CAP256V2LS +  
43 VRC07-523LS + PGT121) bNAb combinations administered SC to HIV-negative women.  
44 Safety will be assessed by the frequency of reactogenicity and adverse events related to  
45 study product. Pharmacokinetic disposition of CAP256V2LS alone and in combination with  
46 VRC07-523LS and PGT121 will be assessed via dose sub-groups and route of  
47 administration.  
48  
49  
50  
51  
52  
53  
54  
55  
56

### 57 **Ethics and dissemination**

58 The University of KwaZulu-Natal Biomedical Research Ethics Committee (BREC) and the  
59 South African Health Products Regulatory Authority (SAHPRA) have granted regulatory  
60

1  
2  
3 approval (Trial reference numbers: BREC00000857/2019 and SAHPRA 20200123). Trial  
4 results will be disseminated through conference presentations, peer-reviewed publications,  
5 and the clinical trial registry.  
6  
7  
8

### 9 **Registration details**

10 PACTR202003767867253 (Status: Pre-Results)  
11  
12  
13

### 14 **Strengths and limitations of this study**

- 15 • This is the first in-human trial to assess the safety and pharmacokinetics of the  
16 monoclonal antibody CAP256V2LS.
- 17 • The trial investigates the administration of CAP256V2LS in combination with two  
18 potent antibodies, VRC07-523LS and PGT121.
- 19 • The trial assesses the subcutaneous administration of monoclonal antibodies for HIV  
20 prevention.
- 21 • The study evaluates the use of a dispersing agent, recombinant human  
22 hyaluronidase (rHuPH20), together with antibodies against HIV.
- 23 • The study is not powered to show efficacy of CAP256V2LS against HIV.  
24  
25  
26  
27  
28  
29  
30  
31  
32  
33

### 34 **Introduction**

35 Despite extensive prevention and treatment efforts, South Africa remains the country worst  
36 affected by the HIV-AIDS pandemic (1). Here, young women carry a disproportionately high  
37 burden of the disease with a persistently high HIV incidence (2, 3). Insights from universal  
38 testing and treatment trials demonstrate that early treatment alone is not sufficient to reduce  
39 the number of new infections and achieve epidemic control, but that effective HIV prevention  
40 methods are also needed (4). In African women, clinical trials evaluating daily oral tenofovir  
41 disoproxil fumarate (TDF) and emtricitabine (TDF/FTC) for pre-exposure prophylaxis  
42 demonstrated inconsistent results, most likely owing to varying adherence levels (5). While  
43 an effective vaccine remains a major challenge, new HIV prevention strategies are urgently  
44 required (6).  
45  
46  
47  
48  
49  
50  
51

52 The discovery of broadly neutralizing antibodies (bNAbs) has allowed scientists to evaluate  
53 passive immunisation as a potential HIV prevention strategy (7, 8). These antibodies are  
54 generally recovered from the memory B cells of chronically HIV-infected individuals and  
55 effectively neutralize diverse strains of HIV-1 indicating their breadth of response. Pre-  
56 clinical studies have demonstrated that passive immunisation using bNAbs protects rhesus  
57  
58  
59  
60

1  
2  
3 macaques from simian-human immunodeficiency virus (SHIV) infection (9-12). However,  
4 there are currently no clinical trial data that show the ability of bNAbs to prevent HIV-1  
5 infection in humans (13).  
6  
7

8  
9 In 2014 and subsequently, several bNAbs targeting the V2 region of the HIV-1 envelope  
10 glycoprotein were isolated from a South African donor participating in the Centre for the  
11 AIDS Programme of Research in South Africa (CAPRISA) 002 Acute Infection study (14,  
12 15). This study was established in 2004 in KwaZulu-Natal, South Africa and followed HIV-  
13 negative participants for identification of subsequent HIV seroconversion. This participant  
14 was infected with a clade C virus and superinfected with a different clade C virus, 15 weeks  
15 later (16). One particular bNAb, referred to as CAP256-VRC26.25, was isolated and found to  
16 be 10 times more potent than the previously published members of this lineage. Its overall  
17 potency ( $IC_{50} = 0.001$  ug/ml) was comparable to, or better than that of existing bNAbs (17).  
18  
19  
20  
21  
22  
23  
24

25 The exceptional potency of this antibody may be related to the reduced dependence on the  
26 N160 glycan, the unique long heavy-chain complementarity-determining region 3 (CDRH3)  
27 conformation, or other structural features that have yet to be identified (18-21). Further  
28 research using site-directed mutagenesis allowed for the manufacturing of an improved LS  
29 version of CAP256-VRC26.25. This mutation increases the binding affinity for the neonatal  
30 Fc-receptor (FcRn), resulting in an increased recirculation of functional immunoglobulin G  
31 (IgG), thereby increasing plasma half-life (22). *In vivo* studies demonstrated that CAP256-  
32 VRC26.25LS was fully protective against a SHIV challenge in monkeys, even at the lowest  
33 dose of 0.08mg/kg, with protection achieved at serum antibody concentrations of  $<0.75$   $\mu$ g/m  
34 (23). This was the lowest dose of any bNAb to show protection in monkeys (24).  
35  
36  
37  
38  
39  
40  
41  
42

43 Furthermore, when tested against a panel of 200 acute infection clade C pseudoviruses,  
44 CAP256-VRC26.25 emerged as the most potent member of bNAbs targeting the V2 loop  
45 (10, 17). The neutralization profile of CAP256-VRC26.25LS was particularly well suited as a  
46 complementary bNAb in combinations with bNAbs targeting other epitopes (17).  
47 CAP256-VRC26.25LS was subsequently engineered to prevent proteolytic clipping of the  
48 heavy chain through mutation of the lysine at position 100 to an alanine (25). This single  
49 amino acid change, K127A, was made in the CDRH3 region to improve manufacturability  
50 without altering neutralization potency or breadth. This non-clipped variant of the antibody is  
51 referred to as CAP256V2LS.  
52  
53  
54  
55  
56  
57

58 Pre-clinical studies in rhesus macaques demonstrated that CAP256V2LS has a half-life of  
59 14.3 days when administered via the intravenous (IV) route and 9.9 days when administered  
60

1  
2  
3 via the subcutaneous (SC) route. Toxicology reports showed that CAP256V2LS displayed  
4 low poly-specific auto-reactivity to HEp-2 cells and cardiolipin (26). In non-human primate  
5 (NHP) studies, non-pathological implications such as anti-cardiolipin activity were associated  
6 with the administration of anti-Env monoclonal antibodies (mAbs). Although these mAbs  
7 have polyspecific reactivities to host antigens (27) the immune response of NHPs to  
8 therapeutic mAbs is not considered to be predictive of the human response. This is due to  
9 the differences at species level. Thus, the ability to compare relative immunogenicity of  
10 mAbs in NHPs and humans is low (28). Its high potency and good breadth against clade C  
11 HIV viruses and long half-life make CAP256V2LS an excellent candidate for further clinical  
12 development. This is particularly important for southern Africa, where clade C is the  
13 dominant circulating virus.  
14  
15  
16  
17  
18  
19  
20  
21

22 The research and development pathway of the CAP256V2LS bNAb led to the CAPRISA 012  
23 clinical trial programme that consists of three trials conducted in South Africa (Figure 1). This  
24 programme aims to evaluate the concept of bNAbs as long-acting pre-exposure prophylaxis  
25 with two to three subcutaneously (SC) doses per year to reduce HIV incidence among young  
26 women in three trials: CAPRISA 012A, a phase 1 trial of VRC07-523LS and PGT121 in HIV-  
27 negative women, previously described in this journal (29), CAPRISA 012B, described here,  
28 and CAPRISA 012C, a phase 2 combination bNAb trial in young women.  
29  
30  
31  
32  
33

34 In CAPRISA 012B, CAP256V2LS will be assessed alone and in combination with VRC07-  
35 523LS and/or PGT121. VRC07-523LS targets the HIV-1 Envelope CD4 binding site and  
36 PGT121 targets the V3 glycan-dependent epitope region of the HIV Envelope protein. Given  
37 the vast genetic diversity of HIV-1, the use of multiple bNAbs may be required to ensure  
38 adequate coverage of circulating strains. Recent clinical trial data demonstrate that VRC07-  
39 523LS is safe with a half-life of 38 days after IV administration and 33 days after SC  
40 administration (30). Preliminary clinical trial data of PGT121 also demonstrate safety with a  
41 half-life of 22 days (31).  
42  
43  
44  
45  
46  
47  
48

49 This trial is also one of the first to assess the use of a recombinant human hyaluronidase  
50 (rHuPH20) together with an anti-HIV monoclonal antibody (32). rHuPH20 is the active  
51 ingredient of the investigational ENHANZE™ Drug Product (EDP) and optimizes the SC  
52 delivery of co-administered therapeutics by depolymerizing hyaluronan in the extracellular  
53 matrix of the SC space that normally serves to restrict increased flow volumes. EDP allows  
54 co-mixing of antibodies with rHuPH20 at the clinical site. Clinical trials conducted in oncology  
55 have demonstrated safety and favourable results with this product (33).  
56  
57  
58  
59  
60

1  
2  
3 SC administration of rHuPH20 was well tolerated in healthy participants, participants with  
4 diabetes, rheumatoid arthritis, cancer and dehydration. SC administrations of rHuPH20  
5 alone or in combination with morphine, ceftriaxone, ondansetron, insulin, adalimumab, IgG  
6 and hydration fluids was also well-tolerated (34, 35). Most adverse events reported were  
7 mild, transient injection site reactions, including erythema, pruritus, tenderness, induration,  
8 and paraesthesia. Moderate injection site reactions, occurring less frequently, include  
9 burning, erythema, pain, and numbness. Mild-to-moderate headache was also reported (33).  
10 Local tissue changes induced by rHuPH20 are reversible within 24-48 hours after  
11 administration, without inflammatory or histological changes. Co-administration  
12 demonstrated beneficial effects such as improved absorption, increased bioavailability and  
13 decreased PK variability (33, 36). rHuPH20 is currently co-formulated with two approved  
14 anticancer therapies, trastuzumab and rituximab.  
15  
16  
17  
18  
19  
20  
21  
22  
23  
24  
25  
26

## 27 **Methods and analysis**

### 28 **Patient and public involvement**

29  
30 The CAPRISA Community Advisory Board (CAB) plays a central role in study planning and  
31 recruitment of participants. The CAB includes local community leaders, traditional leaders,  
32 leadership of local HIV/AIDS organisations, local health service provider representatives,  
33 previous study participants, and HIV-positive local community members. During trial  
34 preparation and prior to study start, the study concept is presented to the CAB members for  
35 their feedback. Recruitment will include community events, local clinics, street recruitment,  
36 and use of snowballing techniques. A recruitment and retention plan will be drawn up at  
37 study start and will be reviewed and updated regularly.  
38  
39  
40  
41  
42  
43  
44  
45

### 46 **Study setting**

47 The CAPRISA 012B trial will be conducted at the CAPRISA eThekweni Clinical Research  
48 Site (ECRS). This site is based in a busy commuter area in the city centre of Durban,  
49 KwaZulu-Natal, South Africa.  
50  
51  
52  
53

### 54 **Study population selection**

55 The study population will consist of 66 women, 52 HIV-negative and 14 HIV-positive women  
56 who have not yet started antiretroviral therapy (ART). All eligibility criteria must be met, and  
57 HIV-positive women will be recruited based on additional inclusion criteria (Table 1).  
58  
59  
60



## Study Design

CAPRISA 012B is a first-in-human, phase I study to assess the safety, tolerability, and pharmacokinetics (PK) of CAP256V2LS. The study is divided into four groups (Table 2). Group 1 is a dose escalation of CAP256V2LS administered IV to HIV-negative and HIV-positive women. Group 2 is a dose escalation of CAP256V2LS administered SC with and without rHuPH20 at a single or repeat dose to HIV-negative women. Groups 3 and 4 are randomized placebo controlled to assess two (CAP256V2LS + VRC07-523LS; CAP256V2LS + PGT121) and three (CAP256V2LS + VRC07-523LS + PGT121) bNAb combinations administered SC to HIV-negative women. Participants will be followed up for 24 weeks after the administration of the last dose of study product/s. HIV positive participants in Groups 1c and 1d will have two additional follow up visits after 12 and 24 months.

## Study Objectives

### *Primary objectives*

- To evaluate the safety and tolerability of CAP256V2LS administered
  - SC in HIV-negative women
  - IV in HIV-negative and HIV-positive women
  - SC in combination with VRC07-523LS and/or PGT121 in HIV-negative women

### *Secondary objectives*

- To characterize the PK profile of CAP256V2LS administered SC as a single dose or as two doses 16 or 24 weeks apart
- To characterize the PK profile of CAP256V2LS administered SC in combination with VRC07-523LS and/or PGT121
- To characterize the PK profile of CAP256V2LS administered IV as a single dose in HIV-negative and HIV-positive women
- To evaluate the antiviral activity of CAP256V2LS administered IV to HIV-positive women not on ART
- To evaluate the concentrations and functional activity of CAP256V2LS in plasma and genital samples following SC and IV administration
- To determine whether administration of CAP256V2LS induces anti-monoclonal antibody responses

- To assess the acceptability of SC administration of monoclonal antibodies among participants

### *Primary Endpoints*

- Proportion of participants with mild, moderate, and severe reactogenicity events within the first 3 days after IV or SC administration of CAP256V2LS
- Proportion of participants with mild, moderate, and severe adverse events as well as serious adverse events (SAEs) related to the IV or SC administration of CAP256V2LS

### *Secondary Endpoints*

- The difference in the elimination half-life, clearance, volume of distribution, and area under the concentration decay curve of CAP256V2LS mAb among study groups
- Change in plasma HIV-1 RNA levels from baseline (only for groups 1c and 1d).
- Changes in the concentration of serum anti-CAP256V2LS titres from baseline
- The difference in the functional activity including IgG/IgA binding responses, cellular immune responses, and antibody function in plasma and mucosal surfaces compared to baseline
- Proportion of participants reporting CAP256V2LS injections to be acceptable as per study questionnaire

### **Sample size calculation**

The main objective of this study is to assess the safety, tolerability, and PK of CAP256V2LS, hence the ability of the study to detect SAEs is key. The probability of detecting no SAE, at least one, or at least two SAEs at a specified true event rate will be calculated. These probabilities highlight the likelihood of the study to detect either rare or common adverse events (AEs). In addition, the 95% confidence interval for the true event rate was calculated. Currently, limited safety data are available to guide the estimation of the true event rate that might be observed in the study. In the absence of available AE rates for CAP256V2LS alone or in combination with other bNAbs, a range of hypothesized event rates to calculate the probability of observing no events, at least one event, or at least two events were used. Among the four participants receiving active product in each of the groups, there is a 34% chance of observing at least one event if the true event rate is 10%. When the true event rate is two or three times higher, this probability rises to 59% and 76% (Table 3).

1  
2  
3 Since the phase I assessment of the safety of CAP256V2LS administered SC includes eight  
4 participants receiving combination of CAP256V2LS and VRC07-523.LS (i.e. Groups 3a and  
5 3b combined), for N=8, there is an 8% chance of observing at least one event, if the true  
6 event rate is 1%, but it is as high as 83%, if the true event is 20%. These probabilities are  
7 also applicable to the groups that will receive repeat doses (Group 2d and 2f). For the 16  
8 participants receiving CAP256V2LS administered IV in Group 1, there is an 85% chance of  
9 observing no events if the event rate is 1%, and less than 1% chance, if the event rate is 30-  
10 fold higher. However, if all 56 women receiving CAP256V2LS active product at enrolment  
11 are combined, the former probability changes to 57% for no events and remains very low  
12 (<1%)-given the event rates of 10%, 20% and 30%. As expected, an increase in sample  
13 size, increases the likelihood of detecting rare events.  
14  
15  
16  
17  
18  
19  
20  
21

## 22 **Study procedures**

### 23 *Informed consent*

24 Prior to screening and enrolment, informed consent will be obtained from every participant in  
25 accordance with the South African Good Clinical Practice guidelines. The informed consent  
26 procedure will be conducted in either English or isiZulu as per participant preference. If a  
27 participant is illiterate, an impartial witness will be present throughout the informed consent  
28 procedure to ensure that all questions are answered to the satisfaction of the potential  
29 participant. For the purposes of this study, consent for all study related procedures,  
30 pharmacogenetic studies, and storage of specimens will be obtained.  
31  
32  
33  
34  
35  
36  
37

### 38 *Screening*

39 All potential participants will complete the informed consent procedure for screening and  
40 provide relevant identification documents. In order to rule out co-enrolment in other  
41 intervention trials, potential participants' details will be checked on the Biometric Co-  
42 Enrolment Prevention System (BCEPS). The study team will also evaluate and review proof  
43 of contraceptive use, such as family planning records. HIV pre-counselling will be performed,  
44 and if the participant meets eligibility, the socio-demographic and behavioural questionnaires  
45 will be administered. Post-test counselling is provided after disclosure of all HIV results and if  
46 the participant is ineligible to enrol into the study, referral to one of several HIV/AIDS care  
47 programmes will be facilitated. HIV testing in this study will be conducted by following a  
48 study HIV algorithm. At screening, HIV testing will be performed using two rapid antibody  
49 testing kits. Any participant with discordant results will be regarded as ineligible and referred  
50 to medical care.  
51  
52  
53  
54  
55  
56  
57  
58  
59  
60

1  
2  
3 A comprehensive medical history and physical examination will be conducted to determine  
4 eligibility. All pre-existing conditions and concomitant medication information will be  
5 documented. Screening laboratory tests will be conducted as per the schedule of  
6 evaluations (SOE) to determine further eligibility. These tests include urinalysis,  
7 haematology, blood chemistry tests, liver function tests, testing for sexually transmitted  
8 infections including syphilis serology and hepatitis B virus assays. Serum and plasma  
9 specimens will also be stored, for further analyses. In addition, a genital specimen using a  
10 menstrual cup device will be obtained and stored (37).  
11  
12  
13  
14  
15  
16

### 17 *Randomisation*

18  
19  
20 An unblinded statistician who is not involved in study conduct, will be responsible for  
21 generating the randomization sequence (for groups 1c,1d, 3a to 3c and Group 4a) using  
22 SAS version 9.4 software or latest. Participants will be assigned to unique participant  
23 identification numbers stratified by HIV status and group number. Sequentially numbered,  
24 sealed, opaque envelopes containing the group number and envelope number or treatment  
25 code (for use by the unblinded pharmacist only) will be provided to the study coordinator, to  
26 be opened once a participant has been deemed eligible and is ready to be enrolled into the  
27 study.  
28  
29  
30  
31  
32  
33

34  
35 The pharmacist will store envelopes in a secured location within the research pharmacy with  
36 access restricted to delegated study pharmacists only. The study pharmacist will also  
37 receive a randomization list consisting of the unique three-digit envelope number and study  
38 group with the corresponding study drug or placebo and relevant dosage from the unblinded  
39 statistician. The envelope number will enable the unblinded pharmacist to assign the correct  
40 treatment to the correct participant.  
41  
42  
43  
44  
45

### 46 *Enrolment*

47  
48 Enrolment will take place within 56 days of screening. After the informed consent is obtained  
49 and eligibility criteria are met, the participant will be allocated to a study group (Table 2). At  
50 this visit, vital signs will be recorded, a targeted physical examination will be conducted and  
51 all laboratory results from the screening visit will be reviewed. For women of childbearing  
52 potential, a negative pregnancy test on that day must be obtained prior to product  
53 administration. Prior to the infusion/injection, the study team must ensure that the participant  
54 is eligible to receive study product. All study product administrations will be completed  
55 according to the assigned group and may be via an IV infusion or SC injection. Once safety  
56 has been established in the first participants, enrolment into the next groups as well as dose-  
57  
58  
59  
60

1  
2  
3 escalation will take place in a sequential manner, following review at each step of safety data  
4 from the preceding groups. For the bNAb combination groups, two separate injections, each  
5 containing a single bNAb, will be administered. After receiving study product, all participants  
6 will be observed for a minimum of 1 hour after the first product and any repeat product  
7 administrations. PK analysis on blood draws will be conducted for both the IV and SC  
8 administration groups at timelines outlined in the SOE.  
9  
10  
11  
12  
13

#### 14 *Management of HIV-positive participants enrolled into Group 1c and 1d*

15 All potential volunteers who meet the eligibility criteria for enrolment will receive extensive  
16 ART counselling upon entering the study. The benefits of early ART initiation including the  
17 universal treatment policy, will be explained. Only participants who, after appropriate  
18 counselling, are willing to defer ART initiation will be eligible to enrol. At each study visit the  
19 participant's decision to defer ART initiation will be reviewed, and participants are allowed to  
20 change their mind and start treatment at any stage during the study. During the study, HIV  
21 positive participants will be monitored closely with regular clinical and safety assessments.  
22 HIV viral load monitoring and CD4 count measurements will take place as per SOE.  
23 Participants will be counselled on reducing the risk of HIV transmission to their sexual  
24 partners. Furthermore, a multidisciplinary approach to HIV transmission risk mitigation will be  
25 followed as per guidance from previous publications (38).  
26  
27  
28  
29  
30  
31  
32  
33  
34

35 Specific criteria to initiate ART within 8 weeks of product administration are listed below and  
36 have been outlined as per guidance previously described for studies designed for ART  
37 interruption (39). Once any of these criteria are met, the participant will receive ART  
38 counselling and will be initiated on ART as per South African guidelines. Criteria to start ART  
39 within 8 weeks of product administration include:  
40  
41

- 42 • Two consecutive viral loads >10,000 copies/ml after 2 weeks post product administration
  - 43 • CD4 count <350 cells/mL
  - 44 • Pregnancy
  - 45 • If ART is deemed medically necessary
  - 46 • If requested by the participant at any stage during the study
- 47  
48  
49  
50  
51

#### 52 **Safety monitoring**

##### 53 *Reactogenicity assessments*

54 Reactogenicity events are 12 common infusion/injection-related signs and symptoms. These  
55 are a subset of adverse events and have specific reporting requirements. Reactogenicity  
56 signs and symptoms are solicited from the start of the infusion/injection through the 3- day  
57  
58  
59  
60

1  
2  
3 post infusion/injection reactogenicity period. Reactogenicity events may be infusion/injection  
4 site reactions (infusion/injection related erythema/redness or induration/swelling), local  
5 symptoms (pain, tenderness) or systemic signs or symptoms (increased body temperature,  
6 malaise and/or fatigue, myalgia, headache, chills, arthralgia, nausea, and vomiting). After  
7 study product administration, the participant will be seen at the clinic for safety assessments  
8 on the day of product administration (Day 0), as well as Day 1, Day 2, and Day 3 (4 days in  
9 total). Clinicians and/or nurses will assess the product administration site(s) for local  
10 reactogenicity on the day of product administration and during the scheduled follow-up visits  
11 for all groups. Participants will keep a daily diary of local and systemic symptoms and record  
12 their temperature for three days after each product administration. In the event of a missed  
13 reactogenicity clinic visit, study staff will review the diary together with the participant once  
14 they present to the clinic and will determine the severity of the reactions. For any  
15 reactogenicity symptoms that are not resolved within 3 days, clinicians will follow and collect  
16 resolution information.  
17  
18  
19  
20  
21  
22  
23  
24  
25  
26

### 27 *Safety monitoring*

28 Safety monitoring includes internal monitoring by the study team, the protocol safety review  
29 team (PSRT), and data safety monitoring board (DSMB), as well as external monitoring  
30 including audits. Safety reporting of SAEs, AEs, and other important reportable events will  
31 be the responsibility of the entire study team. In addition, the study statistician will prepare  
32 routine study safety progress reports, which include reports of AEs experienced by study  
33 participants (blinded to treatment assignment), for review by the PSRT. The PSRT will  
34 review the clinical safety data on a weekly basis via electronic distribution of reports and will  
35 have face-to face meetings as required. The PSRT will be responsible for decisions related  
36 to participant safety. In addition, an independent DSMB will meet in-person and/or via  
37 teleconference semi-annually and review the study data and study conduct. The DSMB  
38 could recommend that the study should proceed as designed, should proceed with design  
39 modifications, or should be discontinued. Furthermore, the PI will permit authorized  
40 representatives such as external monitors and auditors to inspect the site facilities and  
41 records relevant to the study.  
42  
43  
44  
45  
46  
47  
48  
49  
50  
51

### 52 *Follow up visits*

53 All enrolled participants in both intervention and control arms will have follow up visits as  
54 specified in the SOE. At these visits, behavioural questionnaires will be administered  
55 together with HIV risk reduction counselling. Contraception counselling and provision will  
56 also take place. Targeted physical examinations will be conducted and all reactogenicity and  
57 AEs will be recorded. Laboratory investigations specified in the SOE will be conducted by  
58  
59  
60

1  
2  
3 the CAPRISA Research Laboratories. Where required, sample processing and storage of  
4 specimens for potential future testing (blood and vaginal specimens) will also be undertaken.  
5 An accredited contract laboratory will perform all safety blood testing and provide a backup  
6 laboratory service when required.  
7  
8  
9

### 10 11 **Statistical Analysis**

12 Baseline characteristics including demographics and laboratory measurements will be  
13 summarized using descriptive statistics either by group or overall. Summaries of the number  
14 and percentage of participants experiencing any AE or reactogenicity will be analysed. AEs  
15 and SAEs will be coded into the Medical Dictionary for Regulatory Activities (MedDRA)  
16 preferred terms. The number and percentages of participants experiencing each specific AE  
17 will be tabulated by severity and relationship to study product. For the calculations in these  
18 tables, each participant's AE will be counted once under the maximum severity or strongest  
19 recorded causal relationship to study product. A complete listing of AEs for each participant  
20 will provide details including severity, relationship to study product, onset, duration and  
21 outcome. Tolerability evaluation will be mostly descriptive and consist of solicited AEs that  
22 occur within 1 hour following study product administration and reasons for any withdrawal or  
23 discontinuation based on participant discomfort. This early assessment of tolerability of the  
24 monoclonal antibodies will inform which parameters should be solicited or routinely assessed  
25 to further characterise the tolerability profile in a larger number of participants. Where  
26 appropriate, some of the data will be presented graphically. Analysis will be carried out using  
27 either SAS V.9.4 or higher or R.  
28  
29  
30  
31  
32  
33  
34  
35  
36  
37  
38  
39

### 40 **Pharmacokinetic analysis**

41 Pharmacokinetic disposition of CAP256V2LS alone and in combination with VRC07-523LS  
42 and PGT121 will be evaluated in this study and PK will be assessed via dose sub-groups  
43 and route of administration. Sixteen participants will receive CAP256V2LS by the IV route.  
44 The two lower dose levels will be administered to HIV-negative participants and the highest  
45 dose level will be administered to HIV-positive participants. These PK data will serve to  
46 characterize dose effects on CAP256V2LS clearance, volumes of distribution, and  
47 elimination half-life. The PK data across Group 1 will also enable a preliminary evaluation of  
48 the potential impact of HIV status on CAP256V2LS PK. The PK results from the IV  
49 administration groups will be compared to the data from the SC administration groups in  
50 order to estimate bioavailability.  
51  
52  
53  
54  
55  
56  
57

58 A total of 24 participants will receive CAP256V2LS by the SC route, either as a single dose  
59 or a repeat dose. A subset of participants will receive CAP256V2LS with SC hyaluronidase  
60

1  
2  
3 to allow the larger doses of antibody to be administered SC. These data will allow  
4 concentration profiles, bioavailability, and absorption patterns to be established. The impact  
5 of repeat CAP256V2LS SC administration on PK will also be determined. The PK data from  
6 the combination groups (Group 3 and 4) will be compared with those from Group 2 to  
7 determine if co-administration of VRC07-523LS or PGT121 affects CAP256V2LS PK. In  
8 addition, the VRC07-523LS and PGT121 PK results will be compared with findings from PK  
9 studies in CAPRISA 012A and reported in the literature, to establish whether CAP256V2LS  
10 impacts on the PK of VRC07-523LS and PGT121.  
11  
12  
13  
14  
15  
16

### 17 **Data management**

18 Data for the CAPRISA 012B study will be collected on case report forms (CRFs) designed  
19 specifically to address the protocol requirements. Data will be managed by the CAPRISA  
20 Data Management department, using DFdiscover (DF/Net Research, Inc), software  
21 specifically designed for clinical trial data management. The site will record data on paper  
22 CRFs that will be directly captured onto the DFdiscover system and validated by the data  
23 management staff. All source documents will be kept in the participants' study files and  
24 medical charts at the clinical research site. All original CRFs and study related documents  
25 will be securely stored at the site, during the study and after study completion.  
26  
27  
28  
29  
30  
31  
32

### 33 **Ethics and dissemination**

34 Regulatory approval has been granted by the University of KwaZulu-Natal (UKZN)  
35 Biomedical Research Ethics Committee and by the South African Health Products  
36 Regulatory Authority (Trial reference numbers: BREC00000857/2019 and SAHPRA  
37 20200123). The study team will disseminate the trial results by sharing with the scientific  
38 community at international conferences, through peer-reviewed journal publications, and  
39 presentations to the wider community. Trial results will be uploaded onto the UKZN  
40 repository and the Pan-African Clinical Trial Registry (PACTR).  
41  
42  
43  
44  
45  
46  
47

### 48 **Authors' contributions**

49 SSAK and QAK conceived the trial. SSAK, QAK, SM and NG designed the trial. SM and NG  
50 wrote the study protocol. EC will conduct the PK simulations and analysis. NYZ performed  
51 sample size calculations and the statistical analysis strategy. KC, NDR, PLM, JM and LM  
52 contributed to antibody development. CB, TNG, DA, NS, CW, DHB, JM, JL, CAH, BP and  
53 PEF contributed to the planning and conduct of the trial. All authors reviewed the manuscript  
54 and consented to publication.  
55  
56  
57  
58  
59  
60

### **Funding statement**



1  
2  
3 This study is supported by the European and Developing Countries Clinical Trials  
4 Partnership (EDCTP Grant number: RIA2017S) and the South African Medical Research  
5 Council (SAMRC), Special Initiative on HIV Prevention Technology.  
6  
7  
8

9  
10 **Competing interest statement**

11 There are no competing interests to declare.  
12  
13

14 **Patient consent for publication**

15 Not required  
16  
17  
18  
19  
20  
21  
22  
23  
24  
25  
26  
27  
28  
29  
30  
31  
32  
33  
34  
35  
36  
37  
38  
39  
40  
41  
42  
43  
44  
45  
46  
47  
48  
49  
50  
51  
52  
53  
54  
55  
56  
57

58 **Figure Legends**  
59  
60

For peer review only

## Figure 1: CAPRISA 012 clinical trial programme

### Tables

**Table 1: Eligibility criteria**

| Inclusion criteria                                                                                                                                                                                                                                                                                                                                                                                                                                                                                                                                                                                                                                                                                                                                                                                                                                                                                                                      | Exclusion criteria                                                                                                                                                                                                                                                                                                                                                                                                                                                                                                                                                                                                                                                                                                                                                                                                                                                                                                                                                                                                                | Additional inclusion criteria*                                                                                                                                                                                                                                                                                                                                                                                                                          |
|-----------------------------------------------------------------------------------------------------------------------------------------------------------------------------------------------------------------------------------------------------------------------------------------------------------------------------------------------------------------------------------------------------------------------------------------------------------------------------------------------------------------------------------------------------------------------------------------------------------------------------------------------------------------------------------------------------------------------------------------------------------------------------------------------------------------------------------------------------------------------------------------------------------------------------------------|-----------------------------------------------------------------------------------------------------------------------------------------------------------------------------------------------------------------------------------------------------------------------------------------------------------------------------------------------------------------------------------------------------------------------------------------------------------------------------------------------------------------------------------------------------------------------------------------------------------------------------------------------------------------------------------------------------------------------------------------------------------------------------------------------------------------------------------------------------------------------------------------------------------------------------------------------------------------------------------------------------------------------------------|---------------------------------------------------------------------------------------------------------------------------------------------------------------------------------------------------------------------------------------------------------------------------------------------------------------------------------------------------------------------------------------------------------------------------------------------------------|
| <ul style="list-style-type: none"> <li>Age 18 to 45 years</li> <li>Born female</li> <li>Able and willing to complete the informed consent process</li> <li>Able to understand the information provided about the study, willing to comply with protocol procedures, and available to attend the study site for the duration of the study</li> <li>Based on clinical assessment, participants must be in good general health as per opinion of the Principal Investigator (PI) or designee</li> <li>Haemoglobin &gt; 10g/dl</li> <li>Neutrophil count within institutional normal range</li> <li>Platelets within institutional normal range</li> <li>Creatinine &lt; 1.1 times upper limit of normal</li> <li>Alanine aminotransferase &lt; 1.25 times upper limit of normal</li> <li>HIV-negative as per FDA-approved method of detection (for groups with HIV-negative participants only)</li> <li>Negative pregnancy test</li> </ul> | <ul style="list-style-type: none"> <li>Any clinically significant acute or chronic medical condition that in the opinion of the PI/designee makes the participant unsuitable for participation in the study, or jeopardises the safety or rights of the participant</li> <li>Any history of anaphylaxis and related symptoms such as hives, respiratory difficulty, or angioedema</li> <li>Evidence of autoimmune disease or currently receiving immunosuppressive therapy</li> <li>If planning a pregnancy for the duration of the study, currently pregnant or breastfeeding</li> <li>Exceeding 95 kilograms in body weight (due to limitations related to SC antibody administration)</li> <li>A history of alcohol or substance use judged by the PI to potentially interfere with participant study compliance</li> <li>Prior participation in an investigational HIV vaccine trial, except if proof of allocation to the placebo arm is available</li> <li>Administration of a monoclonal antibody or polyclonal</li> </ul> | <ul style="list-style-type: none"> <li>Confirmed HIV-1 infection prior to enrolment</li> <li>An HIV viral load of &gt;1000 copies/ml at screening</li> <li>A CD4 count of <math>\geq</math> 450 cells/<math>\mu</math>l at screening</li> <li>ART naive, and willing to defer treatment (after appropriate counselling) for up to a maximum of 8 weeks after product administration</li> <li>No major comorbidities or AIDS-defining illness</li> </ul> |

|                                                                                                                                                                                                                                                                                                                                                                                                           |                                                                                                                                                                                                                      |  |
|-----------------------------------------------------------------------------------------------------------------------------------------------------------------------------------------------------------------------------------------------------------------------------------------------------------------------------------------------------------------------------------------------------------|----------------------------------------------------------------------------------------------------------------------------------------------------------------------------------------------------------------------|--|
| <ul style="list-style-type: none"> <li>• If of reproductive potential, there is evidence of effective contraceptive use and willingness to adhere to effective contraceptive use during the study period</li> <li>• Willing to have blood samples collected, stored, and used for research purposes.</li> <li>• Willing to adhere to reduced risk sexual behaviour during study participation.</li> </ul> | <p>immunoglobulin within 28 days prior to enrolment</p> <ul style="list-style-type: none"> <li>• Involvement in other concurrent research studies that would interfere with the objectives of this study.</li> </ul> |  |
|-----------------------------------------------------------------------------------------------------------------------------------------------------------------------------------------------------------------------------------------------------------------------------------------------------------------------------------------------------------------------------------------------------------|----------------------------------------------------------------------------------------------------------------------------------------------------------------------------------------------------------------------|--|

\*Additional eligibility criteria for HIV positive participants in Groups 1c and 1d

**Table 2: CAPRISA 012B Group, Dose and Arm Allocation**

| Group                                                              | Participants | Regimen     | SA site<br>N=66  | Dose (mg/kg)                                                 |
|--------------------------------------------------------------------|--------------|-------------|------------------|--------------------------------------------------------------|
| <b>Group 1: Dose escalation of IV administration of CAP256V2LS</b> |              |             |                  |                                                              |
| 1a                                                                 | HIV negative | CAP256V2LS  | 4                | 5 mg/kg IV one dose                                          |
| 1b                                                                 | HIV negative | CAP256V2LS  | 4                | 10 mg/kg IV one dose                                         |
| 1c                                                                 | HIV positive | CAP256V2LS  | 4/2 <sup>§</sup> | 20 mg/kg IV one dose                                         |
| 1d                                                                 | HIV positive | CAP256V2LS  | 4/4 <sup>§</sup> | 20 mg/kg IV one dose                                         |
| <b>Group 2: Dose escalation of SC administration of CAP256V2LS</b> |              |             |                  |                                                              |
| 2a                                                                 | HIV negative | CAP256V2LS  | 4                | 5 mg/kg SC one dose                                          |
| 2b                                                                 | HIV negative | CAP256V2LS* | 4                | 5 mg/kg SC one dose                                          |
| 2c                                                                 | HIV negative | CAP256V2LS* | 4                | 10 mg/kg SC one dose                                         |
| 2d                                                                 | HIV negative | CAP256V2LS* | 4                | 10 mg/kg SC with one repeat dose at 16/24 weeks <sup>#</sup> |
| 2e                                                                 | HIV negative | CAP256V2LS* | 4                | 20 mg/kg SC one dose                                         |
| 2f                                                                 | HIV negative | CAP256V2LS* | 4                | 20 mg/kg SC with one repeat dose at 16/24 weeks <sup>#</sup> |
| <b>Group 3: Dose escalation of the two antibody combinations</b>   |              |             |                  |                                                              |

|                                            |              |                                                          |                  |                                                      |
|--------------------------------------------|--------------|----------------------------------------------------------|------------------|------------------------------------------------------|
| 3a                                         | HIV negative | CAP256V2LS* +<br>VRC07-523.LS*                           | 4/1 <sup>§</sup> | 10 mg/kg SC / 10<br>mg/kg SC one dose                |
| 3b                                         | HIV negative | CAP256V2LS* +<br>VRC07-523.LS*                           | 4/1 <sup>§</sup> | 20 mg/kg SC / 20<br>mg/kg SC one dose                |
| 3c                                         | HIV negative | CAP256V2LS* +<br>PGT121 <sup>§</sup>                     | 4/1 <sup>§</sup> | 20 mg/kg SC / 5 mg/kg<br>SC one dose                 |
| <b>Group 4: Three antibody combination</b> |              |                                                          |                  |                                                      |
| 4a                                         | HIV negative | CAP256V2LS* +<br>PGT121 <sup>§</sup> + VRC07-<br>523.LS* | 4/1 <sup>§</sup> | 20 mg/kg SC / 5 mg/kg<br>SC / 20mg/kg SC one<br>dose |

\*Antibody will be injected with hyaluronidase, so that the antibody dose can be administered as a single SC injection; # First two participants will receive two doses 24 weeks apart and the next two participants will receive two doses 16 weeks apart; <sup>§</sup> PGT121 may be replaced with PGT121LS at a higher dose, based on its availability at the time of study initiation, <sup>§</sup> Placebo allocation

**Table 3:** Probability of observing no events, at least 1 event, or at least 2 events, for a range of hypothetical true event rates

| True event rate (%) | Number of participants | 0 events | 1+ events | 2+ events |
|---------------------|------------------------|----------|-----------|-----------|
| 1                   | 4                      | 0.96     | 0.04      | <0.01     |
|                     | 8                      | 0.92     | 0.08      | <0.01     |
|                     | 12                     | 0.89     | 0.11      | 0.01      |
|                     | 16                     | 0.85     | 0.15      | 0.01      |
|                     | 24                     | 0.79     | 0.21      | 0.02      |
|                     | 56                     | 0.57     | 0.43      | 0.11      |
| 5                   | 4                      | 0.81     | 0.19      | 0.01      |
|                     | 8                      | 0.66     | 0.34      | 0.06      |
|                     | 12                     | 0.54     | 0.46      | 0.12      |
|                     | 16                     | 0.44     | 0.56      | 0.19      |
|                     | 24                     | 0.29     | 0.71      | 0.34      |
|                     | 56                     | 0.06     | 0.94      | 0.78      |
| 10                  | 4                      | 0.66     | 0.34      | 0.05      |
|                     | 8                      | 0.43     | 0.57      | 0.19      |
|                     | 12                     | 0.28     | 0.72      | 0.34      |
|                     | 16                     | 0.19     | 0.81      | 0.49      |
|                     | 24                     | 0.08     | 0.92      | 0.71      |
|                     | 56                     | <0.01    | >0.99     | 0.98      |

|    |    |       |       |       |
|----|----|-------|-------|-------|
|    |    |       |       |       |
| 20 | 4  | 0.41  | 0.59  | 0.18  |
|    | 8  | 0.17  | 0.83  | 0.50  |
|    | 12 | 0.07  | 0.93  | 0.73  |
|    | 16 | 0.03  | 0.97  | 0.86  |
|    | 24 | <0.01 | >0.99 | >0.99 |
|    | 56 | <0.01 | >0.99 | >0.99 |
|    |    |       |       |       |
| 30 | 4  | 0.24  | 0.76  | 0.35  |
|    | 8  | 0.06  | 0.94  | 0.74  |
|    | 12 | 0.01  | 0.99  | 0.91  |
|    | 16 | <0.01 | >0.99 | 0.97  |
|    | 24 | <0.01 | >0.99 | >0.99 |
|    | 56 | <0.01 | >0.99 | >0.99 |

## References

1. HIV/AIDS JUNPo. Geneva: UNAIDS; 2018 [cited 2019]. 2018.
2. De Oliveira T, Kharsany AB, Gräf T, Cawood C, Khanyile D, Grobler A, et al. Transmission networks and risk of HIV infection in KwaZulu-Natal, South Africa: a community-wide phylogenetic study. *The lancet HIV*. 2017;4(1):e41-e50.
3. Dellar RC, Dlamini S, Karim QA. Adolescent girls and young women: key populations for HIV epidemic control. *Journal of the International AIDS Society*. 2015;18:19408.
4. Abdool Karim SS. HIV-1 Epidemic Control—Insights from Test-and-Treat Trials. *Mass Medical Soc*; 2019.
5. Fang W, Mphoyi BI, Motake DR, Liu J, Li W, Mei F, et al. Efficacy, Adherence and Side Effects of PrEP for HIV-1 Prevention. *International Journal of Biology*. 2019;11(4).
6. Fauci AS, Marston HD. Ending the HIV–AIDS pandemic—follow the science. *New England Journal of Medicine*. 2015;373(23):2197-9.
7. Anderson DJ, Politch JA, Vaca GB, Kadasia K, Whaley KJ. Use of Monoclonal Antibodies to Prevent the Sexual Transmission of Human Immunodeficiency Virus Type 1. *Current Immunology Reviews*. 2019;15(1):123-30.
8. Pegu A, Hessel AJ, Mascola JR, Haigwood NL. Use of broadly neutralizing antibodies for HIV-1 prevention. *Immunological reviews*. 2017;275(1):296-312.
9. Hessel AJ, Poignard P, Hunter M, Hangartner L, Tehrani DM, Bleeker WK, et al. Effective, low-titer antibody protection against low-dose repeated mucosal SHIV challenge in macaques. *Nature medicine*. 2009;15(8):951.
10. Walker LM, Huber M, Doores KJ, Falkowska E, Pejchal R, Julien J-P, et al. Broad neutralization coverage of HIV by multiple highly potent antibodies. *Nature*. 2011;477(7365):466.
11. Moldt B, Rakasz EG, Schultz N, Chan-Hui P-Y, Swiderek K, Weisgrau KL, et al. Highly potent HIV-specific antibody neutralization in vitro translates into effective protection against mucosal SHIV challenge in vivo. *Proceedings of the National Academy of Sciences*. 2012;109(46):18921-5.
12. Barouch DH, Whitney JB, Moldt B, Klein F, Oliveira TY, Liu J, et al. Therapeutic efficacy of potent neutralizing HIV-1-specific monoclonal antibodies in SHIV-infected rhesus monkeys. *Nature*. 2013;503(7475):224.
13. Sok D, Burton DR. Recent progress in broadly neutralizing antibodies to HIV. *Nature immunology*. 2018;19(11):1179.
14. van Loggerenberg F, Mlisana K, Williamson C, Auld SC, Morris L, Gray CM, et al. Establishing a cohort at high risk of HIV infection in South Africa: challenges and experiences of the CAPRISA 002 acute infection study. *PLoS one*. 2008;3(4):e1954.
15. Doria-Rose NA, Schramm CA, Gorman J, Moore PL, Bhiman JN, DeKosky BJ, et al. Developmental pathway for potent V1V2-directed HIV-neutralizing antibodies. *Nature*. 2014;509(7498):55.
16. Sheward DJ, Marais J, Bekker V, Murrell B, Eren K, Bhiman JN, et al. HIV superinfection drives de novo antibody responses and not neutralization breadth. *Cell host & microbe*. 2018;24(4):593-9. e3.
17. Wagh K, Bhattacharya T, Williamson C, Robles A, Bayne M, Garrity J, et al. Optimal combinations of broadly neutralizing antibodies for prevention and treatment of HIV-1 clade C infection. *PLoS pathogens*. 2016;12(3):e1005520.
18. Moore PL, Gray ES, Sheward D, Madiga M, Ranchobe N, Lai Z, et al. Potent and broad neutralization of HIV-1 subtype C by plasma antibodies targeting a quaternary epitope including residues in the V2 loop. *Journal of virology*. 2011;85(7):3128-41.
19. Bhiman JN, Anthony C, Doria-Rose NA, Karimanzira O, Schramm CA, Khoza T, et al. Viral variants that initiate and drive maturation of V1V2-directed HIV-1 broadly neutralizing antibodies. *Nature medicine*. 2015;21(11):1332.
20. Doria-Rose NA, Bhiman JN, Roark RS, Schramm CA, Gorman J, Chuang G-Y, et al. New member of the V1V2-directed CAP256-VRC26 lineage that shows increased breadth and exceptional potency. *Journal of virology*. 2016;90(1):76-91.
21. Gorman J, Chuang G-Y, Lai Y-T, Shen C-H, Boyington JC, Druz A, et al. Structure of Super-Potent Antibody CAP256-VRC26. 25 in Complex with HIV-1 Envelope Reveals a Combined Mode of Trimer-Apex Recognition. *Cell Reports*. 2020;31(1):107488.
22. Gaudinski MR, Coates EE, Houser KV, Chen GL, Yamshchikov G, Saunders JG, et al. Safety and pharmacokinetics of the Fc-modified HIV-1 human monoclonal antibody VRC01LS: a phase 1 open-label clinical trial in healthy adults. *PLoS medicine*. 2018;15(1):e1002493.

23. Julg B, Tartaglia LJ, Keele BF, Wagh K, Pegu A, Sok D, et al. Broadly neutralizing antibodies targeting the HIV-1 envelope V2 apex confer protection against a clade C SHIV challenge. *Science translational medicine*. 2017;9(406):eaal1321.
24. Pegu A, Borate B, Huang Y, Pauthner MG, Hessel AJ, Julg B, et al. A Meta-analysis of Passive Immunization Studies Shows that Serum-Neutralizing Antibody Titer Associates with Protection against SHIV Challenge. *Cell Host & Microbe*. 2019;26(3):336-46. e3.
25. Ivleva VB, Schneck NA, Gollapudi D, Arnold F, Cooper JW, Lei QP. Investigation of sequence clipping and structural heterogeneity of an HIV broadly neutralizing antibody by a comprehensive LC-MS analysis. *Journal of The American Society for Mass Spectrometry*. 2018;29(7):1512-23.
26. Centre VR. INVESTIGATOR'S BROCHURE CAP256V2LS (VRC-HIVMAB0102-00-AB) A Broadly Neutralizing HIV-1 Human Monoclonal Antibody. Version 10 12 February 2020
27. Haynes BF, Moody MA, Verkoczy L, Kelsoe G, Alam SM. Antibody polyspecificity and neutralization of HIV-1: a hypothesis. *Human antibodies*. 2005;14(3-4):59-67.
28. van Meer PJ, Kooijman M, Brinks V, Gispens-de Wied CC, Silva-Lima B, Moors EH, et al., editors. Immunogenicity of mAbs in non-human primates during nonclinical safety assessment. *MABs*; 2013: Taylor & Francis.
29. Mahomed S, Garrett N, Capparelli E, Baxter C, Zuma NY, Gengiah T, et al. Assessing the safety and pharmacokinetics of the monoclonal antibodies, VRC07-523LS and PGT121 in HIV negative women in South Africa: study protocol for the CAPRISA 012A randomised controlled phase I trial. *BMJ open*. 2019;9(7):e030283.
30. Gaudinski MR, Houser KV, Doria-Rose NA, Chen GL, Rothwell RSS, Berkowitz N, et al. Safety and pharmacokinetics of broadly neutralising human monoclonal antibody VRC07-523LS in healthy adults: a phase 1 dose-escalation clinical trial. *The Lancet HIV*. 2019;6(10):e667-e79.
31. Stephenson K, Julg B, Ansel J, Walsh S, Tan C, Maxfield L, et al., editors. Therapeutic activity of PGT121 monoclonal antibody in HIV-infected adults. Conference on Retroviruses and Opportunistic Infections; Seattle, Washington; 2019.
32. Mahomed S, Garrett N, Baxter C, Abdool Karim Q, Abdool Karim SS. Clinical trials of broadly neutralizing monoclonal antibodies for HIV Prevention: A Review. *The Journal of Infectious Diseases*. 2020.
33. Locke KW, Maneval DC, LaBarre MJ. ENHANZE® drug delivery technology: a novel approach to subcutaneous administration using recombinant human hyaluronidase PH20. *Drug delivery*. 2019;26(1):98-106.
34. Morcos PN, Zhang X, McIntyre C, Bittner B, Rowell L, Hussain Z. Pharmacokinetics and pharmacodynamics of single subcutaneous doses of tocilizumab administered with or without rHuPH20. *International journal of clinical pharmacology and therapeutics*. 2013;51(7):537-48.
35. Morrow L, Muchmore DB, Ludington EA, Vaughn DE, Hompesch M. Reduction in intrasubject variability in the pharmacokinetic response to insulin after subcutaneous co-administration with recombinant human hyaluronidase in healthy volunteers. *Diabetes technology & therapeutics*. 2011;13(10):1039-45.
36. Shpilberg O, Jackisch C. Subcutaneous administration of rituximab (MabThera) and trastuzumab (Herceptin) using hyaluronidase. *British journal of cancer*. 2013;109(6):1556-61.
37. Archary D, Liebenberg LJ, Werner L, Tulsi S, Majola N, Naicker N, et al. Randomized cross-sectional study to compare HIV-1 specific antibody and cytokine concentrations in female genital secretions obtained by menstrual cup and cervicovaginal lavage. *PloS one*. 2015;10(7).
38. Peluso MJ, Dee L, Campbell D, Taylor J, Hoh R, Rutishauser RL, et al. A collaborative, multidisciplinary approach to HIV transmission risk mitigation during analytic treatment interruption. *Journal of Virus Eradication*. 2020;6(1):34.
39. Julg B, Dee L, Ananworanich J, Barouch DH, Bar K, Caskey M, et al. Recommendations for analytical antiretroviral treatment interruptions in HIV research trials—report of a consensus meeting. *The Lancet HIV*. 2019.

1  
2  
3  
4  
5  
6  
7  
8  
9  
10  
11  
12  
13  
14  
15  
16  
17  
18  
19  
20  
21  
22  
23  
24  
25  
26  
27  
28  
29  
30  
31  
32  
33  
34  
35  
36  
37  
38  
39  
40  
41  
42  
43  
44  
45  
46  
47  
48  
49  
50  
51  
52  
53  
54  
55  
56  
57  
58  
59  
60

**CAPRISA 012A:** Phase I study to assess safety and PK of **VRC07-523LS** and **PGT121** administered subcutaneously in HIV-negative women

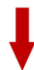

**CAPRISA 012B:** Phase I Dose-Escalation study to assess the safety and PK of **CAP256V2LS** administered intravenously to HIV-negative and HIV-positive women or subcutaneously alone and in combination with **VRC07-523LS** and /or **PGT121** to HIV-negative women

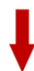

**CAPRISA 012C:** Phase II study to assess extended safety and PK of subcutaneously-administered **CAP256V2LS** in combination with **VRC07-523LS** and /or **CAP256V2LS** in combination with **PGT121** in HIV-negative women

Figure 1: CAPRISA 012 Clinical Trial Programme



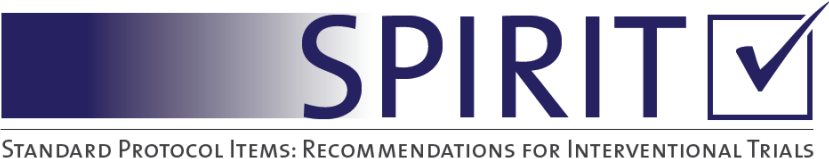

1  
2  
3  
4  
5  
6  
7  
8  
9  
10  
11  
12  
13  
14  
15  
16  
17  
18  
19  
20  
21  
22  
23  
24  
25  
26  
27  
28  
29  
30  
31  
32  
33  
34  
35  
36  
37  
38  
39  
40  
41  
42  
43  
44  
45  
46

SPIRIT 2013 Checklist: Recommended items to address in a clinical trial protocol and related documents\*

| Section/item                      | Item No | Description                                                                                                                                                                                                                                                                              | Addressed on page number                                                               |
|-----------------------------------|---------|------------------------------------------------------------------------------------------------------------------------------------------------------------------------------------------------------------------------------------------------------------------------------------------|----------------------------------------------------------------------------------------|
| <b>Administrative information</b> |         |                                                                                                                                                                                                                                                                                          |                                                                                        |
| Title                             | 1       | Descriptive title identifying the study design, population, interventions, and, if applicable, trial acronym                                                                                                                                                                             | 1                                                                                      |
| Trial registration                | 2a      | Trial identifier and registry name. If not yet registered, name of intended registry                                                                                                                                                                                                     | 33                                                                                     |
|                                   | 2b      | All items from the World Health Organization Trial Registration Data Set                                                                                                                                                                                                                 | 1-13;<br>Registered on the Pan African Clinical Trial Registry (PACTR202003 767867253) |
| Protocol version                  | 3       | Date and version identifier                                                                                                                                                                                                                                                              | 1-35                                                                                   |
| Funding                           | 4       | Sources and types of financial, material, and other support                                                                                                                                                                                                                              | 3                                                                                      |
| Roles and responsibilities        | 5a      | Names, affiliations, and roles of protocol contributors                                                                                                                                                                                                                                  | 2                                                                                      |
|                                   | 5b      | Name and contact information for the trial sponsor                                                                                                                                                                                                                                       | 1                                                                                      |
|                                   | 5c      | Role of study sponsor and funders, if any, in study design; collection, management, analysis, and interpretation of data; writing of the report; and the decision to submit the report for publication, including whether they will have ultimate authority over any of these activities | N/A<br>The applicant is the sponsor                                                    |

1 5d Composition, roles, and responsibilities of the coordinating centre, steering committee, endpoint  
 2 adjudication committee, data management team, and other individuals or groups overseeing the trial, if  
 3 applicable (see Item 21a for data monitoring committee)  
 4  
 5  
 6  
 7  
 8  
 9

26-27

## 10 Introduction

11 Background and 6a Description of research question and justification for undertaking the trial, including summary of relevant 7-12  
 12 rationale studies (published and unpublished) examining benefits and harms for each intervention  
 13  
 14 6b Explanation for choice of comparators 22-23  
 15  
 16 Objectives 7 Specific objectives or hypotheses 12-13  
 17  
 18 Trial design 8 Description of trial design including type of trial (eg, parallel group, crossover, factorial, single group),  
 19 allocation ratio, and framework (eg, superiority, equivalence, noninferiority, exploratory) 13-16  
 20  
 21  
 22

## 23 Methods: Participants, interventions, and outcomes

24 Study setting 9 Description of study settings (eg, community clinic, academic hospital) and list of countries where data will 16  
 25 be collected. Reference to where list of study sites can be obtained  
 26  
 27 Eligibility criteria 10 Inclusion and exclusion criteria for participants. If applicable, eligibility criteria for study centres and 16-17  
 28 individuals who will perform the interventions (eg, surgeons, psychotherapists)  
 29  
 30 Interventions 11a Interventions for each group with sufficient detail to allow replication, including how and when they will be 13-15  
 31 administered  
 32  
 33 11b Criteria for discontinuing or modifying allocated interventions for a given trial participant (eg, drug dose 15,20  
 34 change in response to harms, participant request, or improving/worsening disease)  
 35  
 36 11c Strategies to improve adherence to intervention protocols, and any procedures for monitoring adherence 16, 20  
 37 (eg, drug tablet return, laboratory tests)  
 38  
 39 11d Relevant concomitant care and interventions that are permitted or prohibited during the trial 18-19  
 40  
 41  
 42  
 43  
 44  
 45  
 46

|    |                      |    |                                                                                                                                                                                                                                                                                                                                                                                |                                              |
|----|----------------------|----|--------------------------------------------------------------------------------------------------------------------------------------------------------------------------------------------------------------------------------------------------------------------------------------------------------------------------------------------------------------------------------|----------------------------------------------|
| 1  | Outcomes             | 12 | Primary, secondary, and other outcomes, including the specific measurement variable (eg, systolic blood pressure), analysis metric (eg, change from baseline, final value, time to event), method of aggregation (eg, median, proportion), and time point for each outcome. Explanation of the clinical relevance of chosen efficacy and harm outcomes is strongly recommended | 13                                           |
| 2  |                      |    |                                                                                                                                                                                                                                                                                                                                                                                |                                              |
| 3  |                      |    |                                                                                                                                                                                                                                                                                                                                                                                |                                              |
| 4  |                      |    |                                                                                                                                                                                                                                                                                                                                                                                |                                              |
| 5  |                      |    |                                                                                                                                                                                                                                                                                                                                                                                |                                              |
| 6  | Participant timeline | 13 | Time schedule of enrolment, interventions (including any run-ins and washouts), assessments, and visits for participants. A schematic diagram is highly recommended (see Figure)                                                                                                                                                                                               | Schedule of Evaluations for each study group |
| 7  |                      |    |                                                                                                                                                                                                                                                                                                                                                                                |                                              |
| 8  |                      |    |                                                                                                                                                                                                                                                                                                                                                                                |                                              |
| 9  |                      |    |                                                                                                                                                                                                                                                                                                                                                                                |                                              |
| 10 |                      |    |                                                                                                                                                                                                                                                                                                                                                                                |                                              |
| 11 |                      |    |                                                                                                                                                                                                                                                                                                                                                                                |                                              |
| 12 | Sample size          | 14 | Estimated number of participants needed to achieve study objectives and how it was determined, including clinical and statistical assumptions supporting any sample size calculations                                                                                                                                                                                          | 27-29                                        |
| 13 |                      |    |                                                                                                                                                                                                                                                                                                                                                                                |                                              |
| 14 |                      |    |                                                                                                                                                                                                                                                                                                                                                                                |                                              |
| 15 | Recruitment          | 15 | Strategies for achieving adequate participant enrolment to reach target sample size                                                                                                                                                                                                                                                                                            | 17-18                                        |
| 16 |                      |    |                                                                                                                                                                                                                                                                                                                                                                                |                                              |
| 17 |                      |    |                                                                                                                                                                                                                                                                                                                                                                                |                                              |

**Methods: Assignment of interventions (for controlled trials)**

Allocation:

|    |                                  |     |                                                                                                                                                                                                                                                                                                                                                          |            |
|----|----------------------------------|-----|----------------------------------------------------------------------------------------------------------------------------------------------------------------------------------------------------------------------------------------------------------------------------------------------------------------------------------------------------------|------------|
| 22 | Sequence generation              | 16a | Method of generating the allocation sequence (eg, computer-generated random numbers), and list of any factors for stratification. To reduce predictability of a random sequence, details of any planned restriction (eg, blocking) should be provided in a separate document that is unavailable to those who enrol participants or assign interventions | 13-14,19   |
| 23 |                                  |     |                                                                                                                                                                                                                                                                                                                                                          |            |
| 24 |                                  |     |                                                                                                                                                                                                                                                                                                                                                          |            |
| 25 |                                  |     |                                                                                                                                                                                                                                                                                                                                                          |            |
| 26 |                                  |     |                                                                                                                                                                                                                                                                                                                                                          |            |
| 27 |                                  |     |                                                                                                                                                                                                                                                                                                                                                          |            |
| 28 | Allocation concealment mechanism | 16b | Mechanism of implementing the allocation sequence (eg, central telephone; sequentially numbered, opaque, sealed envelopes), describing any steps to conceal the sequence until interventions are assigned                                                                                                                                                | 19, 20, 23 |
| 29 |                                  |     |                                                                                                                                                                                                                                                                                                                                                          |            |
| 30 |                                  |     |                                                                                                                                                                                                                                                                                                                                                          |            |
| 31 |                                  |     |                                                                                                                                                                                                                                                                                                                                                          |            |
| 32 | Implementation                   | 16c | Who will generate the allocation sequence, who will enrol participants, and who will assign participants to interventions                                                                                                                                                                                                                                | 23         |
| 33 |                                  |     |                                                                                                                                                                                                                                                                                                                                                          |            |
| 34 |                                  |     |                                                                                                                                                                                                                                                                                                                                                          |            |
| 35 | Blinding (masking)               | 17a | Who will be blinded after assignment to interventions (eg, trial participants, care providers, outcome assessors, data analysts), and how                                                                                                                                                                                                                | 23         |
| 36 |                                  | 17b | If blinded, circumstances under which unblinding is permissible, and procedure for revealing a participant's allocated intervention during the trial                                                                                                                                                                                                     | 23         |
| 37 |                                  |     |                                                                                                                                                                                                                                                                                                                                                          |            |
| 38 |                                  |     |                                                                                                                                                                                                                                                                                                                                                          |            |
| 39 |                                  |     |                                                                                                                                                                                                                                                                                                                                                          |            |
| 40 |                                  |     |                                                                                                                                                                                                                                                                                                                                                          |            |
| 41 |                                  |     |                                                                                                                                                                                                                                                                                                                                                          |            |
| 42 |                                  |     |                                                                                                                                                                                                                                                                                                                                                          |            |

1 **Methods: Data collection, management, and analysis**

2

3 Data collection 18a Plans for assessment and collection of outcome, baseline, and other trial data, including any related 29-30

4 methods processes to promote data quality (eg, duplicate measurements, training of assessors) and a description of

5 study instruments (eg, questionnaires, laboratory tests) along with their reliability and validity, if known.

6 Reference to where data collection forms can be found, if not in the protocol

7

8

9 18b Plans to promote participant retention and complete follow-up, including list of any outcome data to be 20,26,27,32

10 collected for participants who discontinue or deviate from intervention protocols

11

12 Data management 19 Plans for data entry, coding, security, and storage, including any related processes to promote data quality 30-31

13 (eg, double data entry; range checks for data values). Reference to where details of data management

14 procedures can be found, if not in the protocol

15

16

17 Statistical methods 20a Statistical methods for analysing primary and secondary outcomes. Reference to where other details of the 29-30

18 statistical analysis plan can be found, if not in the protocol

19

20 20b Methods for any additional analyses (eg, subgroup and adjusted analyses) 29-30

21

22 20c Definition of analysis population relating to protocol non-adherence (eg, as randomised analysis), and any N/A

23 statistical methods to handle missing data (eg, multiple imputation)

24

25

26 **Methods: Monitoring**

27

28 Data monitoring 21a Composition of data monitoring committee (DMC); summary of its role and reporting structure; statement of 26-27

29 whether it is independent from the sponsor and competing interests; and reference to where further details

30 about its charter can be found, if not in the protocol. Alternatively, an explanation of why a DMC is not

31 needed

32

33

34 21b Description of any interim analyses and stopping guidelines, including who will have access to these interim 15,16,26,27

35 results and make the final decision to terminate the trial

36

37 Harms 22 Plans for collecting, assessing, reporting, and managing solicited and spontaneously reported adverse 24-26

38 events and other unintended effects of trial interventions or trial conduct

39

40 Auditing 23 Frequency and procedures for auditing trial conduct, if any, and whether the process will be independent 27

41 from investigators and the sponsor

42

43

44

45

46

## 1 **Ethics and dissemination**

|    |                      |     |                                                                                                                 |     |
|----|----------------------|-----|-----------------------------------------------------------------------------------------------------------------|-----|
| 2  |                      |     |                                                                                                                 |     |
| 3  | Research ethics      | 24  | Plans for seeking research ethics committee/institutional review board (REC/IRB) approval                       | 31  |
| 4  | approval             |     |                                                                                                                 |     |
| 5  |                      |     |                                                                                                                 |     |
| 6  | Protocol             | 25  | Plans for communicating important protocol modifications (eg, changes to eligibility criteria, outcomes,        | 31  |
| 7  | amendments           |     | analyses) to relevant parties (eg, investigators, REC/IRBs, trial participants, trial registries, journals,     |     |
| 8  |                      |     | regulators)                                                                                                     |     |
| 9  |                      |     |                                                                                                                 |     |
| 10 |                      |     |                                                                                                                 |     |
| 11 | Consent or assent    | 26a | Who will obtain informed consent or assent from potential trial participants or authorised surrogates, and      | 31  |
| 12 |                      |     | how (see Item 32)                                                                                               |     |
| 13 |                      |     |                                                                                                                 |     |
| 14 |                      | 26b | Additional consent provisions for collection and use of participant data and biological specimens in ancillary  | 31  |
| 15 |                      |     | studies, if applicable                                                                                          |     |
| 16 |                      |     |                                                                                                                 |     |
| 17 | Confidentiality      | 27  | How personal information about potential and enrolled participants will be collected, shared, and maintained    | 33  |
| 18 |                      |     | in order to protect confidentiality before, during, and after the trial                                         |     |
| 19 |                      |     |                                                                                                                 |     |
| 20 | Declaration of       | 28  | Financial and other competing interests for principal investigators for the overall trial and each study site   | 2-3 |
| 21 | interests            |     |                                                                                                                 |     |
| 22 |                      |     |                                                                                                                 |     |
| 23 |                      |     |                                                                                                                 |     |
| 24 | Access to data       | 29  | Statement of who will have access to the final trial dataset, and disclosure of contractual agreements that     | 33  |
| 25 |                      |     | limit such access for investigators                                                                             |     |
| 26 |                      |     |                                                                                                                 |     |
| 27 | Ancillary and post-  | 30  | Provisions, if any, for ancillary and post-trial care, and for compensation to those who suffer harm from trial | 18  |
| 28 | trial care           |     | participation                                                                                                   |     |
| 29 |                      |     |                                                                                                                 |     |
| 30 | Dissemination policy | 31a | Plans for investigators and sponsor to communicate trial results to participants, healthcare professionals,     | 33  |
| 31 |                      |     | the public, and other relevant groups (eg, via publication, reporting in results databases, or other data       |     |
| 32 |                      |     | sharing arrangements), including any publication restrictions                                                   |     |
| 33 |                      |     |                                                                                                                 |     |
| 34 |                      |     |                                                                                                                 |     |
| 35 |                      | 31b | Authorship eligibility guidelines and any intended use of professional writers                                  | N/A |
| 36 |                      |     |                                                                                                                 |     |
| 37 |                      | 31c | Plans, if any, for granting public access to the full protocol, participant-level dataset, and statistical code | 33  |
| 38 |                      |     |                                                                                                                 |     |

## 39 **Appendices**

|   |                  |    |                                                                                                           |    |
|---|------------------|----|-----------------------------------------------------------------------------------------------------------|----|
| 1 | Informed consent | 32 | Model consent form and other related documentation given to participants and authorised surrogates        | 31 |
| 2 | materials        |    |                                                                                                           |    |
| 3 |                  |    |                                                                                                           |    |
| 4 | Biological       | 33 | Plans for collection, laboratory evaluation, and storage of biological specimens for genetic or molecular | 21 |
| 5 | specimens        |    | analysis in the current trial and for future use in ancillary studies, if applicable                      |    |
| 6 |                  |    |                                                                                                           |    |

7 \*It is strongly recommended that this checklist be read in conjunction with the SPIRIT 2013 Explanation & Elaboration for important clarification on the items.  
8 Amendments to the protocol should be tracked and dated. The SPIRIT checklist is copyrighted by the SPIRIT Group under the Creative Commons  
9 "[Attribution-NonCommercial-NoDerivs 3.0 Unported](#)" license.  
10  
11  
12  
13  
14  
15  
16  
17  
18  
19  
20  
21  
22  
23  
24  
25  
26  
27  
28  
29  
30  
31  
32  
33  
34  
35  
36  
37  
38  
39  
40  
41  
42  
43  
44  
45  
46

For peer review only
